# Supplementary material for: Discovery and Biosynthesis of Persiathiacins: Unusual Polyglycosylated Thiopeptides Active Against Multidrug Resistant Tuberculosis
Source: PubMed Central journal article supplement (PMC11406533; doi:10.1021/acsinfecdis.4c00502), 2024-08-27
Supplement: id4c00502_si_001.pdf [file id4c00502_si_001.pdf]

# Discovery and biosynthesis of persiathiacins: Unusual polyglycosylated thiopeptides active against multi-drug resistant tuberculosis

Yousef Dashti,<sup>ab\*</sup> Fatemeh Mohammadipanah,<sup>c</sup> Yu Zhang,<sup>a</sup> Pietra M. Cerqueira Diaz,<sup>a</sup> Anthony Vocat,<sup>d</sup> Daniel Zabala,<sup>a‡</sup> Christopher D. Fage,<sup>a‡</sup> Isolda Romero-Canelon,<sup>ae</sup> Boyke Bunk,<sup>f</sup> Cathrin Spröer,<sup>f</sup> Lona M. Alkhalaf,<sup>a</sup> Jörg Overmann,<sup>fg</sup> Stewart T. Cole<sup>d‡</sup> and Gregory L. Challis<sup>ahij\*</sup>

<sup>a</sup> Department of Chemistry, University of Warwick, Coventry CV4 7AL, United Kingdom

<sup>b</sup> Sydney Infectious Diseases Institute, Faculty of Medicine and Health, University of Sydney, Sydney NSW 2015, Australia

<sup>c</sup> Department of Microbiology, School of Biology and Center of Excellence in Phylogeny of Living Organisms, College of Science, University of Tehran, 14155-6455, Tehran, Iran

<sup>d</sup> Global Health Institute, Ecole Polytechnique Fédérale de Lausanne, Station 19, 1015 Lausanne, Switzerland

<sup>e</sup> School of Pharmacy, Institute of Clinical Sciences, University of Birmingham, Birmingham B15 2TT, United Kingdom

<sup>f</sup> Leibniz-Institute DSMZ-German Collection of Microorganisms and Cell Cultures, 38124 Braunschweig, Germany, and Technical University of Braunschweig, 38106 Braunschweig, Germany

<sup>g</sup> German Centre of Infection Research (DZIF), Partner Site Hannover-Braunschweig, 38124 Braunschweig, Germany

<sup>h</sup> Warwick Integrative Synthetic Biology Centre, University of Warwick, Coventry CV4 7AL, United Kingdom

<sup>i</sup> Department of Biochemistry and Molecular Biology, Monash University, Clayton VIC 3168, Australia

<sup>j</sup> ARC Centre of Excellence for Innovations in Peptide and Protein Science, Monash University, Clayton VIC 3168, Australia

<sup>‡</sup> Current addresses: S.T.C. Institut Pasteur, 25 – 28 rue du Docteur Roux, 75015 Paris, France; C.D.F. Institute for Integrative Biology of the Cell (I2BC), CEA, CNRS, Université Paris-Saclay, 91198 Gif-sur-Yvette, France; D.Z. Faes Farma, Autonomia Etorbidea, 10, 48940 Leioa, Bizkaia, Spain.

\* Corresponding authors: [yousef.dashti@sydney.edu.au](mailto:yousef.dashti@sydney.edu.au) and [g.l.challis@warwick.ac.uk](mailto:g.l.challis@warwick.ac.uk)

| Contents                                                                                                                                                                       | Page    |
|--------------------------------------------------------------------------------------------------------------------------------------------------------------------------------|---------|
| Figure S1. Structure of persiathiacin A, numbered as in Table S1.                                                                                                              | S2      |
| Table S1. <sup>1</sup> H and <sup>13</sup> C NMR chemical shifts of persiathiacin A in CDCl <sub>3</sub> -CD <sub>3</sub> OD (9:1).                                            | S3-S5   |
| Figure S2. Structure of persiathiacin B, numbered as in Table S2.                                                                                                              | S6      |
| Table S2. <sup>1</sup> H and <sup>13</sup> C NMR chemical shifts of persiathiacin B in CDCl <sub>3</sub> -CD <sub>3</sub> OD (9:1).                                            | S7-S9   |
| Figure S3. <sup>1</sup> H NMR spectrum of persiathiacin A in CDCl <sub>3</sub> -CD <sub>3</sub> OD (9:1).                                                                      | S10     |
| Figure S4. <sup>13</sup> C NMR spectrum of persiathiacin A in CDCl <sub>3</sub> -CD <sub>3</sub> OD (9:1).                                                                     | S11     |
| Figure S5. <sup>1</sup> H- <sup>1</sup> H COSY spectrum of persiathiacin A in CDCl <sub>3</sub> -CD <sub>3</sub> OD (9:1).                                                     | S12     |
| Figure S6. <sup>1</sup> H- <sup>13</sup> C HSQC spectrum of persiathiacin A in CDCl <sub>3</sub> -CD <sub>3</sub> OD (9:1).                                                    | S13     |
| Figure S7. <sup>1</sup> H- <sup>13</sup> C HMBC spectrum of persiathiacin A in CDCl <sub>3</sub> -CD <sub>3</sub> OD (9:1).                                                    | S14     |
| Figure S8. <sup>1</sup> H- <sup>1</sup> H ROSEY spectrum of persiathiacin A in CDCl <sub>3</sub> -CD <sub>3</sub> OD (9:1).                                                    | S15     |
| Figure S9. <sup>1</sup> H NMR spectrum of persiathiacin B in CDCl <sub>3</sub> -CD <sub>3</sub> OD (9:1).                                                                      | S16     |
| Figure S10. <sup>13</sup> C NMR spectrum of persiathiacin B in CDCl <sub>3</sub> -CD <sub>3</sub> OD (9:1).                                                                    | S17     |
| Figure S11. <sup>1</sup> H- <sup>1</sup> H COSY spectrum of persiathiacin B in CDCl <sub>3</sub> -CD <sub>3</sub> OD (9:1).                                                    | S18     |
| Figure S12. <sup>1</sup> H- <sup>13</sup> C HSQC spectrum of persiathiacin B in CDCl <sub>3</sub> -CD <sub>3</sub> OD (9:1).                                                   | S19     |
| Figure S13. <sup>1</sup> H- <sup>13</sup> C HMBC spectrum of persiathiacin B in CDCl <sub>3</sub> -CD <sub>3</sub> OD (9:1).                                                   | S20     |
| Figure S14. <sup>1</sup> H- <sup>1</sup> H ROSEY spectrum of persiathiacin B in CDCl <sub>3</sub> -CD <sub>3</sub> OD (9:1).                                                   | S21     |
| Table S3: Predicted specialized metabolite biosynthetic gene clusters in the genome of <i>Actinokineospora</i> sp. UTM 2448.                                                   | S22     |
| Table S4: Genes/proteins in the persiathiacin biosynthetic gene cluster and their similarity to homologous proteins.                                                           | S23-S24 |
| Figure S15. Similarities and differences in the activation and attachment of MIA to the nosiheptide, persiathiacin, and nocathiacin processed core peptides.                   | S25     |
| Figure S16. Mass spectrum of PerX.                                                                                                                                             | S26     |
| Figure S17. SDS-PAGE and intact protein MS of purified recombinant PerS4.                                                                                                      | S27     |
| Figure S18. Percentage of A2780 ovarian cancer cells surviving after exposure to increasing concentrations of persiathiacin A (10 to 400 μM) relative to an untreated control. | S27     |

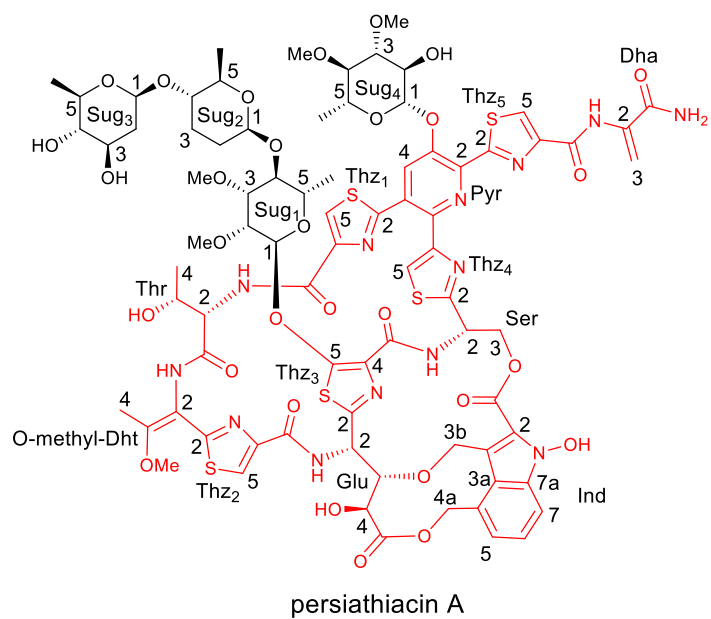

**Figure S1.** Structure of persiathiacin A, numbered as in Table S1.

**Table S1.**  $^1\text{H}$  (500 MHz) and  $^{13}\text{C}$  (125 MHz) and HMBC NMR data for persiathiacin A in  $\text{CDCl}_3\text{-CD}_3\text{OD}$  (9:1).

|                  | Position | $\delta_{\text{C}}$ | $\delta_{\text{H}}$            | HMBC                                      | ROESY                                        |
|------------------|----------|---------------------|--------------------------------|-------------------------------------------|----------------------------------------------|
| Dha              | C=O      | 166.5               |                                |                                           |                                              |
|                  | C2       | 133.5               |                                |                                           |                                              |
|                  | C3       | 104.8               | H3a: 5.5, brs<br>H3b: 6.5, brs | Dha-(C=O)<br>Dha-(C2, C=O)                | Dha-(H3b)<br>Dha-(H3a)                       |
|                  | NH       |                     | 9.98, s                        | Dha-(C3, C=O),<br>Thz5-(C4, C=O)          |                                              |
| Thz5             | C2       | 166.9               |                                |                                           |                                              |
|                  | C4       | 151.2               |                                |                                           |                                              |
|                  | C5       | 127.2               | 8.15, s                        | Thz5-(C2, C4,<br>C=O)                     |                                              |
|                  | C=O      | 160.0               |                                |                                           |                                              |
| Pyr              | C2       | 139.8               |                                |                                           |                                              |
|                  | C3       | 149.0               |                                |                                           |                                              |
|                  | C4       | 126.7               | 7.77, s                        | Pyr-(C2, C3, C6),<br>Thz-(C2)             | Sug4-(H1)                                    |
|                  | C5       | 128.3               |                                |                                           |                                              |
|                  | C6       | 144.8               |                                |                                           |                                              |
| Thz1             | C2       | 165.5               |                                |                                           |                                              |
|                  | C4       | 149.1               |                                |                                           |                                              |
|                  | C5       | 125.2               | 8.25, s                        | Thz1-(C2, C4,<br>C=O)                     | Thr-(H4)                                     |
|                  | C=O      | 161.8               |                                |                                           |                                              |
| Thr              | NH       |                     | 7.87, brs                      | Thz1-(C=O)                                |                                              |
|                  | C=O      | 167.5               |                                |                                           |                                              |
|                  | C2       | 56.2                | 4.21, dd, $J = 4.0, 5.5$       | Thr-(C3, C4,<br>C=O), Thz1-<br>(C=O)      | Thr-(H3)<br>Dht-(NH)                         |
|                  | C3       | 64.7                | 2.88, m                        | Thr-(C=O)                                 | Thr-(H2)                                     |
|                  | C4       | 17.7                | 1.34, d, $J = 6.0$             | Thr-(C2, C3)                              | Thz1-(H5)                                    |
| O-methyl-<br>Dht | NH       |                     | 8.31, s                        | Dht-(C3), Thr-<br>(C=O)                   | Thr-(H2)                                     |
|                  | C2       | 110.7               |                                |                                           |                                              |
|                  | C3       | 158.7               |                                |                                           |                                              |
|                  | C4       | 13.7                | 1.86, s                        | Dht-(C2, C3),<br>Thz2-(C2)                | Dht-(NH,<br>OCH <sub>3</sub> ), Thr-<br>(H2) |
|                  | OMe      | 55.8                | 3.78, s                        | Dht-(C3)                                  | Dht-(H4)                                     |
| Thz2             | C2       | 161.8               |                                |                                           |                                              |
|                  | C4       | 146.1               |                                |                                           |                                              |
|                  | C5       | 124.3               | 7.96, s                        | Thz2-(C2, C4,<br>C=O), Dht-(C2)           |                                              |
|                  | C=O      | 161.7               |                                |                                           |                                              |
| Glu              | NH       |                     | 8.24, brs                      | Glu-(C2, C3),<br>Thz2-(C=O)               | Glu-(H2, H4)                                 |
|                  | C2       | 48.7                | 5.80, d, $J = 10.0$            | Glu-(C3, C4),<br>Thz3-(C2)                | Glu-(NH, H3,<br>H4)                          |
|                  | C3       | 82.9                | 3.65, m                        | Glu-(C4, C=O),<br>Thz3-(C2), Ind<br>(C3b) | Glu-(H2), Ind-<br>(H3ba/b)                   |

|        |      |       |                                                            |                                                                  |                                                              |
|--------|------|-------|------------------------------------------------------------|------------------------------------------------------------------|--------------------------------------------------------------|
|        | C4   | 67.7  | 4.09, d, $J = 10.0$                                        | Glu-(C2, C3, C=O)                                                | Glu-(NH, H2, H3)                                             |
|        | C=O  | 174.5 |                                                            |                                                                  |                                                              |
| Thz3   | C2   | 154.8 |                                                            |                                                                  |                                                              |
|        | C4   | 130.9 |                                                            |                                                                  |                                                              |
|        | C5   | 160.3 |                                                            |                                                                  |                                                              |
|        | C=O  | 160.3 |                                                            |                                                                  |                                                              |
| Ser    | NH   |       | 7.89, d, $J = 11.0$                                        | Ser-(C2, C3), Thz3-(C4, C=O)                                     | Ser-(H2, H3b)                                                |
|        | C2   | 48.6  | 5.62, dd, $J = 6.0, 10.5$                                  | Ser-(C3), Thz3-(C=O), Thz4-(C2)                                  | Ser-(NH, H3a/b)                                              |
|        | C3   | 64.5  | H3a: 4.36, d, $J = 11.5$<br>H3b: 5.21, dd, $J = 6.0, 11.5$ | Ser-(C2), Thz4-(C2), Ind-(C=O)<br>Ser-(C2), Thz4-(C2), Ind-(C=O) | Ser-(H2, H3b)<br>Ser-(NH, H2, H3a)                           |
| Thz4   | C2   | 169.8 |                                                            |                                                                  |                                                              |
|        | C4   | 154.7 |                                                            |                                                                  |                                                              |
|        | C5   | 121.2 | 7.77, s                                                    | Thz4-(C2, C4), Pyr-(C6)                                          |                                                              |
| Ind    | C=O  | 161.4 |                                                            |                                                                  |                                                              |
|        | C2   | 127.0 |                                                            |                                                                  |                                                              |
|        | C3   | 109.8 |                                                            |                                                                  |                                                              |
|        | C3a  | 119.5 |                                                            |                                                                  |                                                              |
|        | C3b  | 65.9  | H3ba: 4.17, d, $J = 10.5$<br>H3bb: 4.91, d, $J = 10.5$     | Ind-(C2, C3, C3a), Glu-(C3)<br>Ind-(C2, C3, C3a)                 | Glu-(H3), Ind-(H3bb, H4ab)<br>Glu-(H3), Ind-(H3ba), Ser-(NH) |
|        | C4   | 127.8 |                                                            |                                                                  |                                                              |
|        | C4a  | 68.4  | H4aa: 4.95, d, $J = 12.5$<br>H4ab: 5.92, d, $J = 12.5$     | Ind-(C3a, C4, C5), Glu-(C=O)<br>Ind-(C3a, C4, C5), Glu-(C=O)     | Ind-(H3ba, H4ab, H5)<br>Ind-(H3ba, H4aa, H5)                 |
|        | C5   | 123.5 | 7.10, d, $J = 7.0$                                         | Ind-(C3a, C4a, C6, C7)                                           | Ind-(H4aa, H4ab, H6)                                         |
|        | C6   | 125.1 | 7.35, dd, $J = 7.0, 8.5$                                   | Ind-(C4, C5, C7, C7a)                                            | Ind-(H5, H7)                                                 |
|        | C7   | 112.1 | 7.74, d, $J = 8.5$                                         | Ind-(C3a, C5)                                                    | Ind-(H6)                                                     |
|        | C7a  | 135.3 |                                                            |                                                                  |                                                              |
|        | N-OH |       | 10.46, s                                                   | Ind-(C2)                                                         |                                                              |
|        | Sug1 | C1    | 101.9                                                      | 5.41, brs                                                        | Thz3-(C5), Sug1-(C3, C5)                                     |
| C2     |      | 76.0  | 4.00, m                                                    | Sug1-(C1, C3, C4, C2-OMe)                                        | Sug1-(H1, H3, C2-OCH <sub>3</sub> )                          |
| C2-OMe |      | 59.4  | 3.48, s                                                    | Sug1-(C2)                                                        | Sug1-(H1)                                                    |
| C3     |      | 80.1  | 3.60, m                                                    | Sug1-(C1, C5, C3-OMe)                                            | Sug1-(H2, C3-OCH <sub>3</sub> )                              |
| C3-OMe |      | 57.9  | 3.42, s                                                    | Sug1-(C3)                                                        | Sug1-(H2, H4)                                                |
| C4     |      | 77.0  | 3.64, m                                                    | Sug1-(C2, C5, C6), Sug2-(C1)                                     | Sug2-(H1)                                                    |
| C5     |      | 70.1  | 3.63, m                                                    | Sug1-(C1, C3, C4, C6)                                            | Sug1-(H2, H6)                                                |

|      |        |       |                              |                              |                                                |
|------|--------|-------|------------------------------|------------------------------|------------------------------------------------|
|      | C6     | 17.7  | 1.31, d, $J = 5.5$           | Sug1-(C4, C5)                | Sug1-(H4)                                      |
| Sug2 | C1     | 102.2 | 4.61, d, $J = 9.0$           | Sug1-(C4), Sug2-(C2, C5)     | Sug1-(H4), Sug2-(H2b, H3a, H5)                 |
|      | C2     | 30.8  | H2a: 1.39, m<br>H2b: 1.79, m | Sug2-(C1, C3, C4)            | Sug2-(H1, H2b, H3b, H4)<br>Sug2-(H1, H2a, H3b) |
|      | C3     | 29.9  | H3a: 1.40, m<br>H3b: 2.09, m | Sug2-(C1, C4)                | Sug2-(H2b, H4)                                 |
|      | C4     | 80.6  | 3.08, m                      | Sug2-(C5, C6), Sug3-(C1)     | Sug3-(H1), Sug2-(H3a/b, H6)                    |
|      | C5     | 74.1  | 3.26, m                      | Sug2-(C1, C3, C6)            | Sug2-(H1, H3b, H6)                             |
|      | C6     | 18.0  | 1.12, d, $J = 6.0$           | Sug2-(C4, C5)                | Sug2-(H4, H5), Sug3-(H1)                       |
| Sug3 | C1     | 101.1 | 4.43, d, $J = 9.5$           | Sug2-(C4), Sug3-(C2, C3, C5) | Sug2-(H4, H6), Sug3-(H2a, H3, H5)              |
|      | C2     | 39.0  | H2a: 1.46, m<br>H2b: 2.06, m | Sug3-(C1, C3, C4)            | Sug3-(H2b, H4)<br>Sug3-(H1, H2a, H3)           |
|      | C3     | 71.3  | 3.42, <i>ol*</i>             | Sug3-(C1, C5)                | Sug3-(H1, H2b)                                 |
|      | C4     | 77.0  | 2.90, m                      | Sug3-(C2, C5, C6)            | Sug3-(H2a, H3, H6)                             |
|      | C5     | 71.8  | 3.14, m                      | Sug3-(C1, C4, C6)            | Sug3-(H1, H3, H6)                              |
|      | C6     | 17.7  | 1.20, d, $J = 6.0$           | Sug3-(C4, C5)                | Sug3-(H4, H5)                                  |
| Sug4 | C1     | 100.4 | 5.18, d, $J = 7.5$           | Pyr-(C3), Sug4-(C3, C5)      | Pyr-(H4), Sug4-(H2, H3, H5)                    |
|      | C2     | 69.5  | 4.14, dd, $J = 7.5, 10.0$    | Sug4-(C1, C3)                | Sug4-(H1, C3-OCH <sub>3</sub> )                |
|      | C3     | 84.2  | 3.17, <i>ol</i>              | Sug4-(C2, C4, C3-OMe)        | Sug4-(H1, H5)                                  |
|      | C3-OMe | 58.1  | 3.45, s                      | Sug4-(C3)                    |                                                |
|      | C4     | 77.6  | 3.42, <i>ol</i>              | Sug4-(C2, C4-OMe)            | Sug4-(H6)                                      |
|      | C4-OMe | 61.8  | 3.51, s                      | Sug4-(C4)                    | Sug4-(H6)                                      |
|      | C5     | 71.3  | 3.76, m                      | Sug4-(C1, C3, C4, C6)        | Sug4-(H1, H4, H6)                              |
|      | C6     | 16.7  | 1.30, d, $J = 6.0$           | Sug4-(C4, C5)                |                                                |

\* overlapped

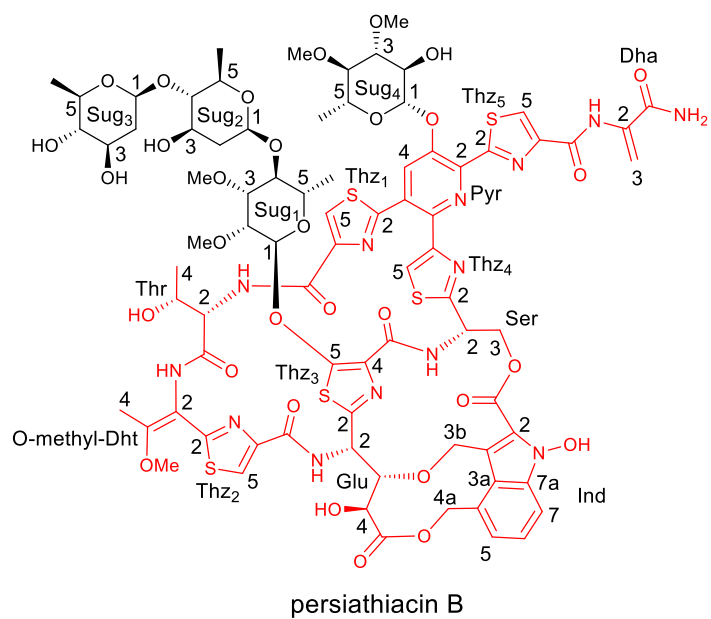

**Figure S2.** Structure of persiathiacin B, numbered as in Table S2.

**Table S2.**  $^1\text{H}$  (700 MHz) and  $^{13}\text{C}$  (176 MHz) and HMBC NMR data of persiathiacin B in  $\text{CDCl}_3\text{-CD}_3\text{OD}$  (9:1).

|              | Position | $\delta_{\text{C}}$ | $\delta_{\text{H}}$              | HMBC                            | ROESY                                 |
|--------------|----------|---------------------|----------------------------------|---------------------------------|---------------------------------------|
| Dha          | C=O      | 166.7               |                                  |                                 |                                       |
|              | C2       | 133.5               |                                  |                                 |                                       |
|              | C3       | 105.1               | H3a: 5.56, brs<br>H3b: 6.51, brs | Dha-(C=O)<br>Dha-(C2, C=O)      | Dha-(H3b)<br>Dha-(H3a)                |
|              | NH       |                     | 9.98, s                          | Deala-(C3, C=O), Thz5-(C4, C=O) |                                       |
| Thz5         | C2       | 167.1               |                                  |                                 |                                       |
|              | C4       | 151.2               |                                  |                                 |                                       |
|              | C5       | 127.4               | 8.21, s                          | Thz5-(C2, C4, C=O)              |                                       |
|              | C=O      | 160.1               |                                  |                                 |                                       |
| Pyr          | C2       | 139.9               |                                  |                                 |                                       |
|              | C3       | 149.1               |                                  |                                 |                                       |
|              | C4       | 126.9               | 7.79, s                          | Pyr-(C2, C3, C6), Thz-(C2)      | Sug4-(H1)                             |
|              | C5       | 128.4               |                                  |                                 |                                       |
|              | C6       | 145.0               |                                  |                                 |                                       |
| Thz1         | C2       | 165.5               |                                  |                                 |                                       |
|              | C4       | 149.1               |                                  |                                 |                                       |
|              | C5       | 125.2               | 8.27, s                          | Thz1-(C2, C4, C=O)              | Thr-(H4)                              |
|              | C=O      | 161.9               |                                  |                                 |                                       |
| Thr          | NH       |                     | 7.94, brs                        | Thz1-(C=O)                      |                                       |
|              | C=O      | 167.5               |                                  |                                 |                                       |
|              | C2       | 56.2                | 4.26, t, $J = 4.0$               | Thr-(C3, C4, C=O), Thz1-(C=O)   | Thr-(H3)<br>Dht-(NH)                  |
|              | C3       | 64.8                | 2.90, m                          | Thr-(C=O)                       | Thr-(H2)                              |
|              | C4       | 17.6                | 1.37, d, $J = 6.0$               | Thr-(C2, C3)                    | Thz1-(H5)                             |
| O-methyl-Dht | NH       |                     | 8.35, s                          | Dht-(C3), Thr-(C=O)             | Thr-(H2)                              |
|              | C2       | 110.7               |                                  |                                 |                                       |
|              | C3       | 158.8               |                                  |                                 |                                       |
|              | C4       | 13.7                | 1.89, s                          | Dht-(C2, C3), Thz2-(C2)         | Dht-(NH, OCH <sub>3</sub> ), Thr-(H2) |
|              | OMe      | 55.9                | 3.81, s                          | Dht-(C3)                        | Dht-(H4)                              |
| Thz2         | C2       | 161.8               |                                  |                                 |                                       |
|              | C4       | 146.1               |                                  |                                 |                                       |
|              | C5       | 124.4               | 7.99, s                          | Thz2-(C2, C4, C=O), Dht-(C2)    |                                       |
|              | C=O      | 161.8               |                                  |                                 |                                       |
| Glu          | NH       |                     | 8.27, brs                        | Glu-(C2, C3), Thz2-(C=O)        | Glu-(NH, H2, H4)                      |
|              | C2       | 48.7                | 5.82, dd, $J = 1.5, 10.0$        | Glu-(C3, C4), Thz3-(C2)         | Glu-(H3, H4)                          |

|      |        |       |                                                               |                                                                          |                                                                          |
|------|--------|-------|---------------------------------------------------------------|--------------------------------------------------------------------------|--------------------------------------------------------------------------|
|      | C3     | 83.0  | 3.66, m                                                       | Glu-(C4, C=O),<br>Thz3-(C2), Ind<br>(C3b)                                | Glu-(H2), Ind-<br>(H3ba/b)                                               |
|      | C4     | 67.8  | 4.12, d, $J = 10.0$                                           | Glu-(C2, C3,<br>C=O)                                                     | Glu-(NH, H2,<br>H3)                                                      |
|      | C=O    | 174.5 |                                                               |                                                                          |                                                                          |
| Thz3 | C2     | 154.7 |                                                               |                                                                          |                                                                          |
|      | C4     | 131.0 |                                                               |                                                                          |                                                                          |
|      | C5     | 160.3 |                                                               |                                                                          |                                                                          |
|      | C=O    | 160.3 |                                                               |                                                                          |                                                                          |
| Ser  | NH     |       | 7.91, d, $J = 11.0$                                           | Ser-(C2, C3),<br>Thz3-(C4,<br>C=O)                                       | Ser-(H2, H3b)                                                            |
|      | C2     | 48.6  | 5.66, dd, $J = 6.0, 11.0$                                     | Ser-(C3), Thz3-<br>(C=O), Thz4-<br>(C2)                                  | Ser-(NH,<br>H3a/b)                                                       |
|      | C3     | 64.4  | H3a: 4.40, d, $J = 11.5$<br>H3b: 5.25, dd, $J = 6.0,$<br>11.5 | Ser-(C2), Thz4-<br>(C2), Ind-(C=O)<br>Ser-(C2), Thz4-<br>(C2), Ind-(C=O) | Ser-(H2, H3b)<br>Ser-(NH, H2,<br>H3a)                                    |
| Thz4 | C2     | 169.9 |                                                               |                                                                          |                                                                          |
|      | C4     | 154.7 |                                                               |                                                                          |                                                                          |
|      | C5     | 121.3 | 7.76, s                                                       | Thz4-(C2, C4),<br>Pyr-(C6)                                               |                                                                          |
| Ind  | C=O    | 161.4 |                                                               |                                                                          |                                                                          |
|      | C2     | 127.1 |                                                               |                                                                          |                                                                          |
|      | C3     | 109.8 |                                                               |                                                                          |                                                                          |
|      | C3a    | 119.6 |                                                               |                                                                          |                                                                          |
|      | C3b    | 65.9  | H3ba: 4.22, d, $J = 10.5$<br>H3bb: 4.95, d, $J = 10.5$        | Ind-(C2, C3,<br>C3a), Glu-(C3)<br>Ind-(C2, C3,<br>C3a)                   | Glu-(H3), Ind-<br>(H3bb, H4ab)<br>Glu-(H3), Ind-<br>(H3ba), Ser-<br>(NH) |
|      | C4     | 127.9 |                                                               |                                                                          |                                                                          |
|      | C4a    | 68.4  | H4aa: 5.00, d, $J = 12.5$<br>H4ab: 5.97, d, $J = 12.5$        | Ind-(C3a, C4,<br>C5), Glu-(C=O)<br>Ind-(C3a, C4,<br>C5), Glu-(C=O)       | Ind-(H3ba,<br>H4ab, H5)<br>Ind-(H3ba,<br>H4aa, H5)                       |
|      | C5     | 123.6 | 7.14, d, $J = 7.0$                                            | Ind-(C3a, C4a,<br>C6, C7)                                                | Ind-(H4aa/b,<br>H6)                                                      |
|      | C6     | 125.1 | 7.39, dd, $J = 7.0, 8.5$                                      | Ind-(C4, C5,<br>C7, C7a)                                                 | Ind-(H5, H7)                                                             |
|      | C7     | 112.2 | 7.80, d, $J = 8.5$                                            | Ind-(C3a, C5)                                                            | Ind-(H6)                                                                 |
|      | C7a    | 135.3 |                                                               |                                                                          |                                                                          |
|      | N-OH   |       | 10.51, s                                                      | Ind-(C2)                                                                 |                                                                          |
| Sug1 | C1     | 101.8 | 5.45, brs                                                     | Thz3-(C5),<br>Sug1-(C2, C3,<br>C5)                                       | Sug1-(H2, H4,<br>C2-OCH <sub>3</sub> )                                   |
|      | C2     | 75.9  | 4.04, m                                                       | Sug1-(C1, C3,<br>C4, C2-OMe)                                             | Sug1-(H1, H3,<br>C2-OCH <sub>3</sub> )                                   |
|      | C2-OMe | 59.4  | 3.51, s                                                       | Sug1-(C2)                                                                | Sug1-(H1, H2)                                                            |
|      | C3     | 80.1  | 3.64, m                                                       | Sug1-(C4, C3-<br>OMe)                                                    | Sug1-(H2, C3-<br>OCH <sub>3</sub> )                                      |



|      |        |       |                              |                                    |                                                    |
|------|--------|-------|------------------------------|------------------------------------|----------------------------------------------------|
|      | C3-OMe | 57.9  | 3.45, s                      | Sug1-(C3)                          | Sug1-(H2, H4)                                      |
|      | C4     | 77.3  | 3.67, m                      | Sug1-(C5),<br>Sugar 2-(C1)         | Sug1-(H6, C3-<br>OCH <sub>3</sub> ), Sug2-<br>(H1) |
|      | C5     | 70.0  | 3.68, m                      | Sug1-(C1, C3,<br>C6)               |                                                    |
|      | C6     | 17.4  | 1.34, d, $J = 5.5$           | Sug1-(C4, C5)                      | Sug1-(H4)                                          |
| Sug2 | C1     | 100.2 | 4.71, dd, $J = 1.5, 9.0$     | Sug1-(C4),<br>Sug2-(C2)            | Sug1-(H4),<br>Sug2-(H2b,<br>H3, H5)                |
|      | C2     | 38.3  | H2a: 1.41, m<br>H2b: 2.20, m | Sug2-(C1, C3,<br>C4)               | Sug2-(H2b,<br>H4)<br>Sug2-(H1,<br>H2a, H3)         |
|      | C3     | 69.6  | 3.52, m                      | Sug2-(C4)                          | Sug2-(H1,<br>H2b)                                  |
|      | C4     | 88.2  | 2.90, m                      | Sug2-(C5, C6),<br>Sug3-(C1)        | Sug3-(H1),<br>Sug2-(H6)                            |
|      | C5     | 70.0  | 3.23, m                      | Sug2-(C1, C4,<br>C6)               | Sug2-(H1, H3,<br>H6)                               |
|      | C6     | 17.6  | 1.18, d, $J = 6.0$           | Sug2-(C4, C5)                      | Sug2-(H4, H5)                                      |
| Sug3 | C1     | 101.0 | 4.45, dd, $J = 2.0, 10.0$    | Sug2-(C4),<br>Sug3-(C2, C3,<br>C5) | Sug2-(H4, H6),<br>Sug3-(H2b,<br>H3, H5)            |
|      | C2     | 38.7  | H2a: 1.56, m<br>H2b: 2.16, m | Sug3-(C1, C3,<br>C4)               | Sug3-(H2b,<br>H4)<br>Sug3-(H1,<br>H2b)             |
|      | C3     | 70.9  | 3.48, <i>ol</i>              |                                    | Sug3-(H1,<br>H2b, H5)                              |
|      | C4     | 76.7  | 2.96, m                      | Sug3-(C3, C5,<br>C6)               | Sug3-(H2a,<br>H6)                                  |
|      | C5     | 72.3  | 3.28, m                      | Sug3-(C1, C3,<br>C4, C6)           | Sug3-(H1, H6)                                      |
|      | C6     | 17.4  | 1.26, d, $J = 6.0$           | Sug3-(C4, C5)                      | Sug3-(H4, H5)                                      |
| Sug4 | C1     | 100.5 | 5.18, d, $J = 7.5$           | Pyr-(C3), Sug4-<br>(C3, C5)        | Pyr-(H4),<br>Sug4-(H3, H5)                         |
|      | C2     | 69.5  | 4.19, dd, $J = 7.5, 9.5$     | Sug4-(C1, C3)                      | Sug4-(H1, H3)                                      |
|      | C3     | 84.3  | 3.24, <i>ol</i>              | Sug4-(C1, C2,<br>C3-OMe)           | Sug4-(H1, H2,<br>H5)                               |
|      | C3-OMe | 58.1  | 3.50, s                      | Sug4-(C3)                          | Sug4-(H3)                                          |
|      | C4     | 77.6  | 3.48, <i>ol</i>              | Sug4-(C4-OMe)                      | Sug4-(H5, H6)                                      |
|      | C4-OMe | 61.9  | 3.56, s                      | Sug4-(C4)                          | Sug4-(H6)                                          |
|      | C5     | 71.3  | 3.78, m                      | Sug4-(C1, C3,<br>C4, C6)           | Sug4-(H1, H3,<br>H4, H6)                           |
|      | C6     | 16.8  | 1.35, d, $J = 6.5$           | Sug4-(C4, C5)                      | Sug4-(H4, H5,<br>C4-OCH <sub>3</sub> )             |

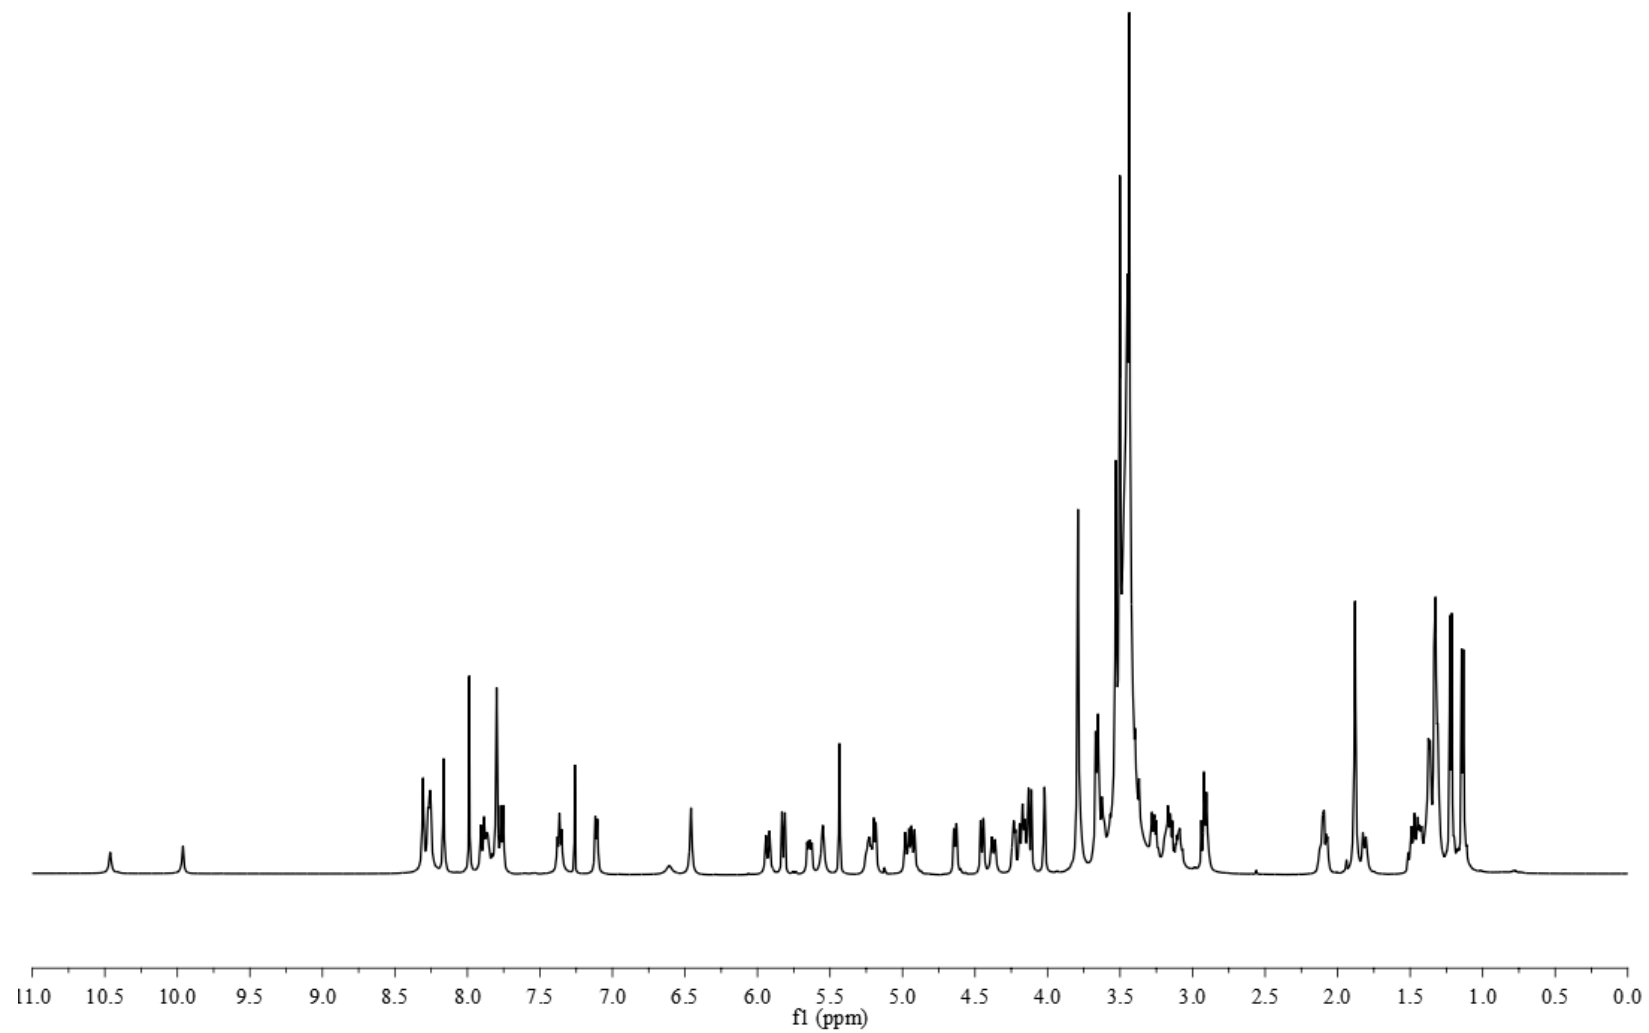

**Figure S3.** <sup>1</sup>H NMR spectrum (500 MHz) of persiathiacin A in CDCl<sub>3</sub>-CD<sub>3</sub>OD (9:1).

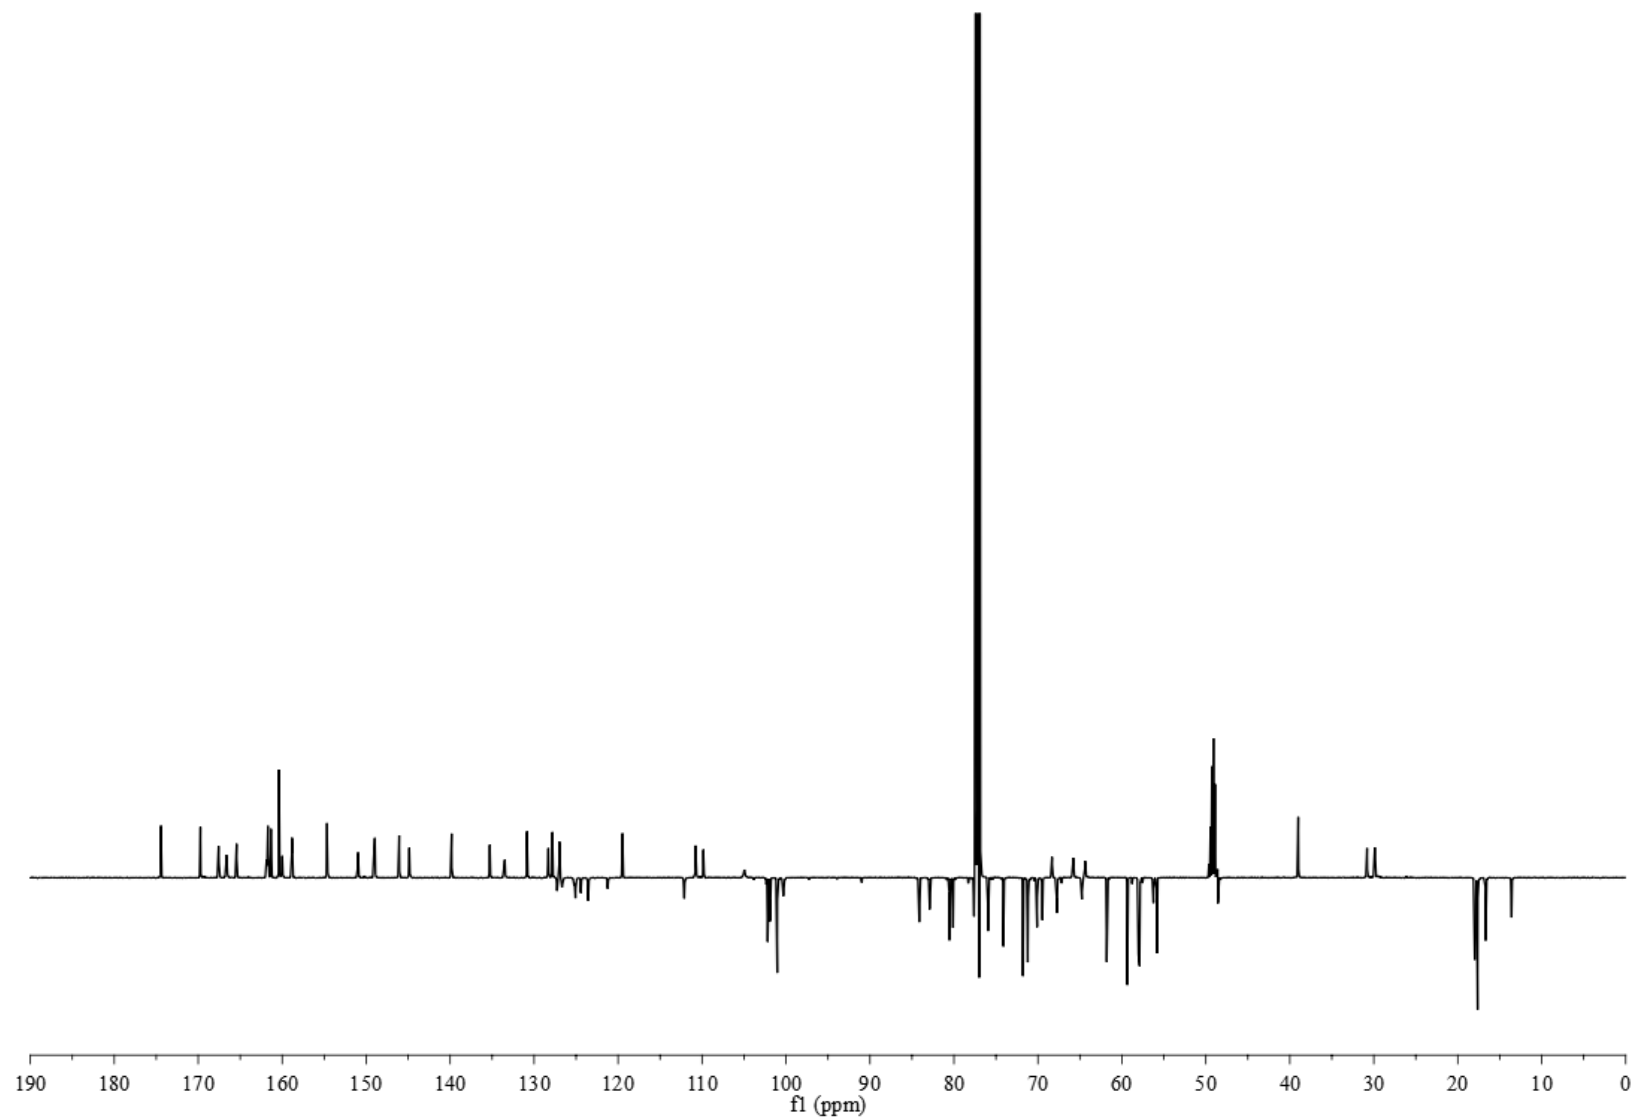

**Figure S4.**  $^{13}\text{C}$  NMR spectrum (125 MHz) of persiathiacin A in  $\text{CDCl}_3\text{-CD}_3\text{OD}$  (9:1).

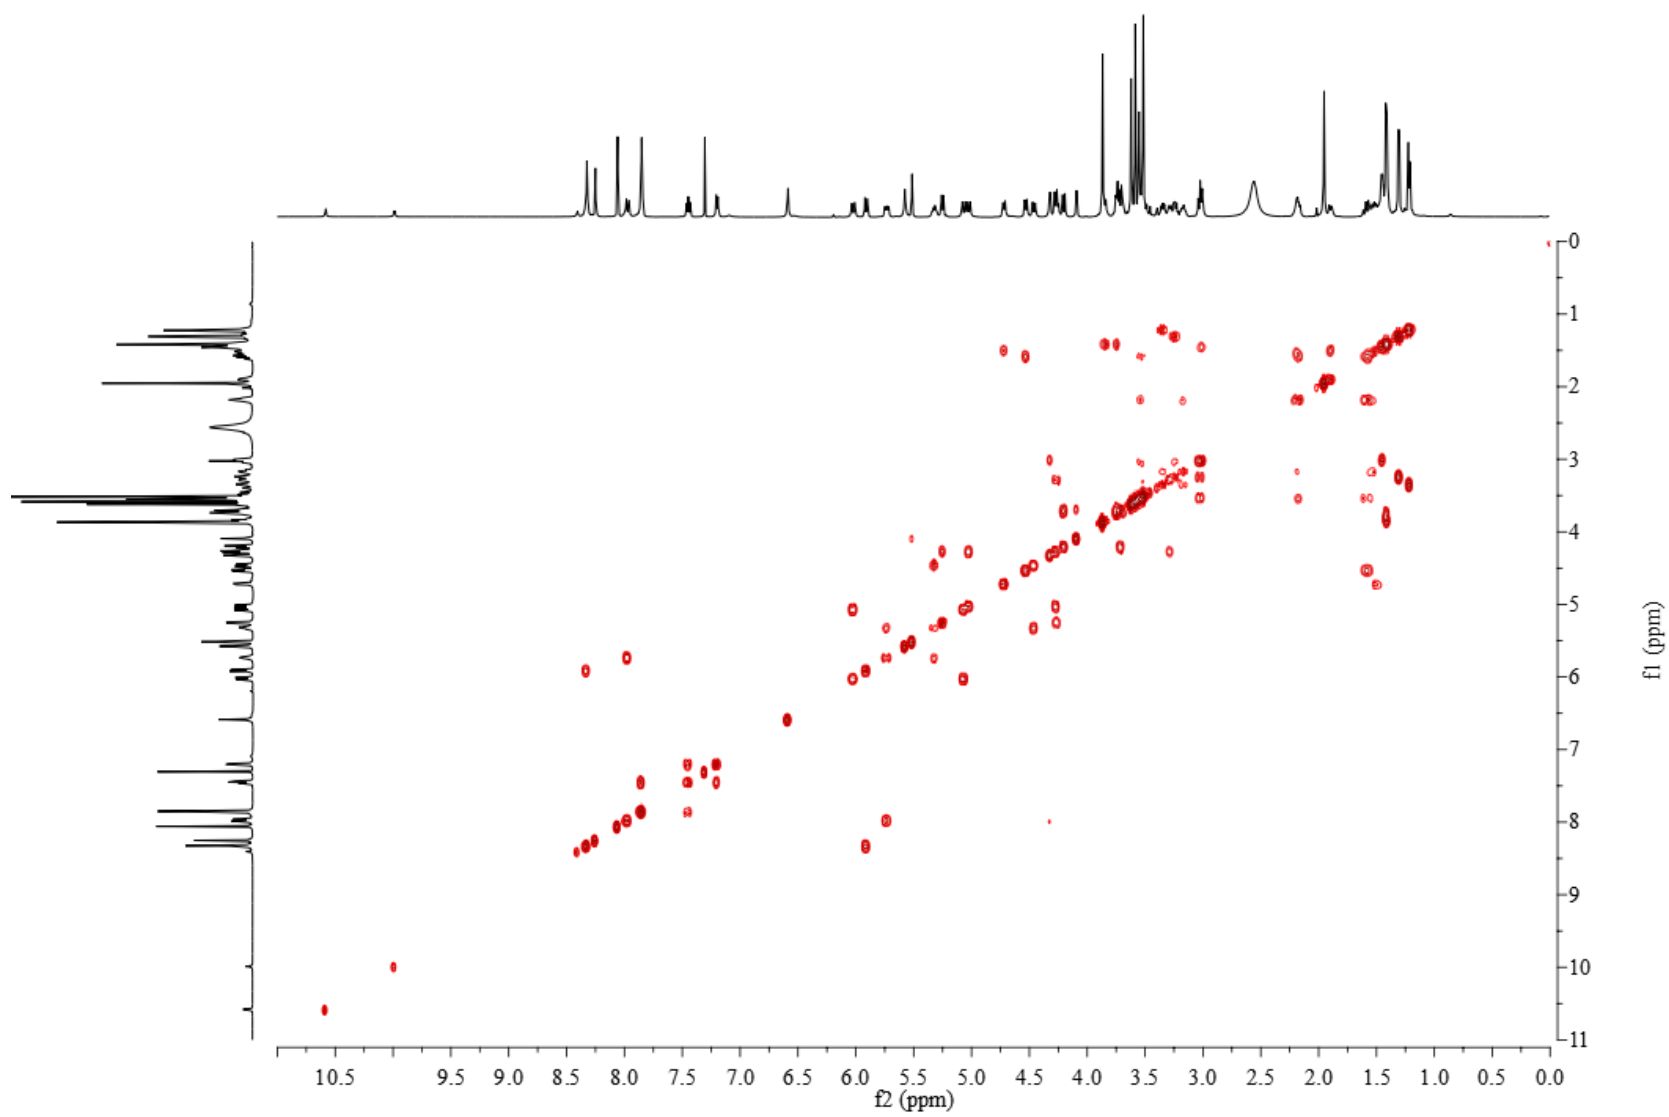

**Figure S5.**  $^1\text{H}$ - $^1\text{H}$  COSY spectrum of persiathiacin A in  $\text{CDCl}_3$ - $\text{CD}_3\text{OD}$  (9:1).

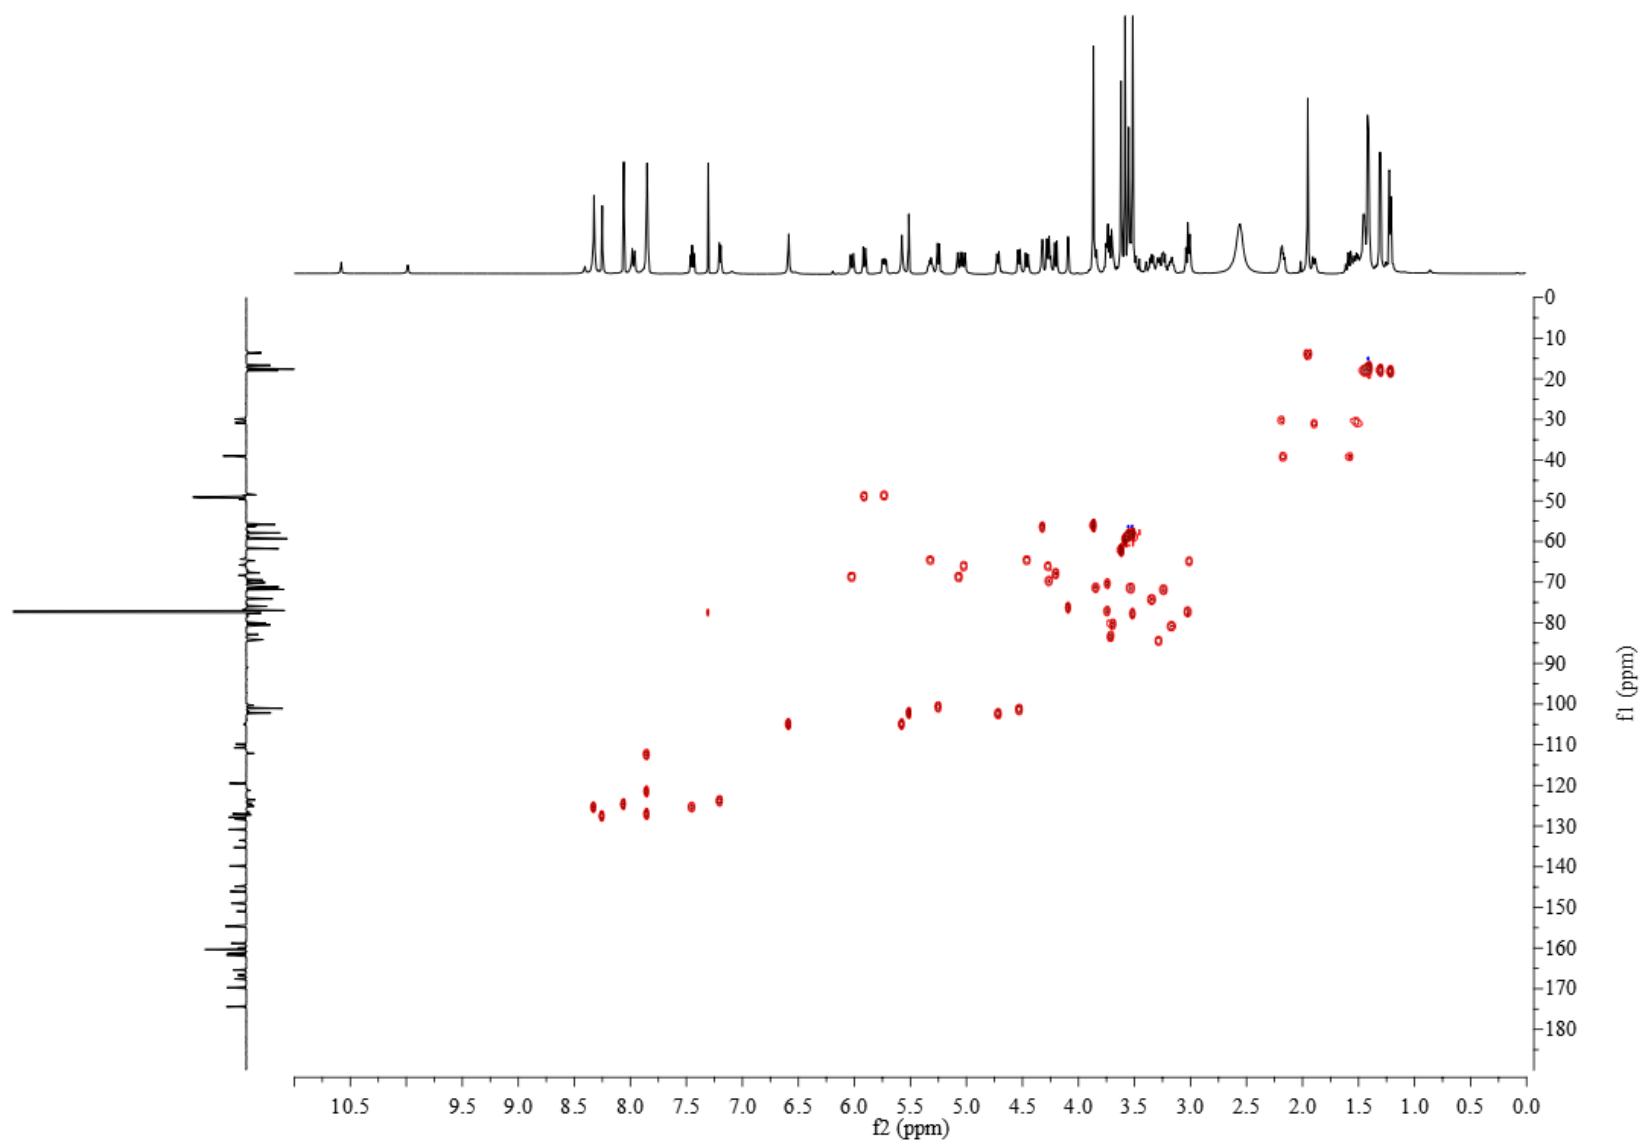

**Figure S6.**  $^1\text{H}$ - $^{13}\text{C}$  HSQC spectrum of persiathiacin A in  $\text{CDCl}_3$ - $\text{CD}_3\text{OD}$  (9:1).

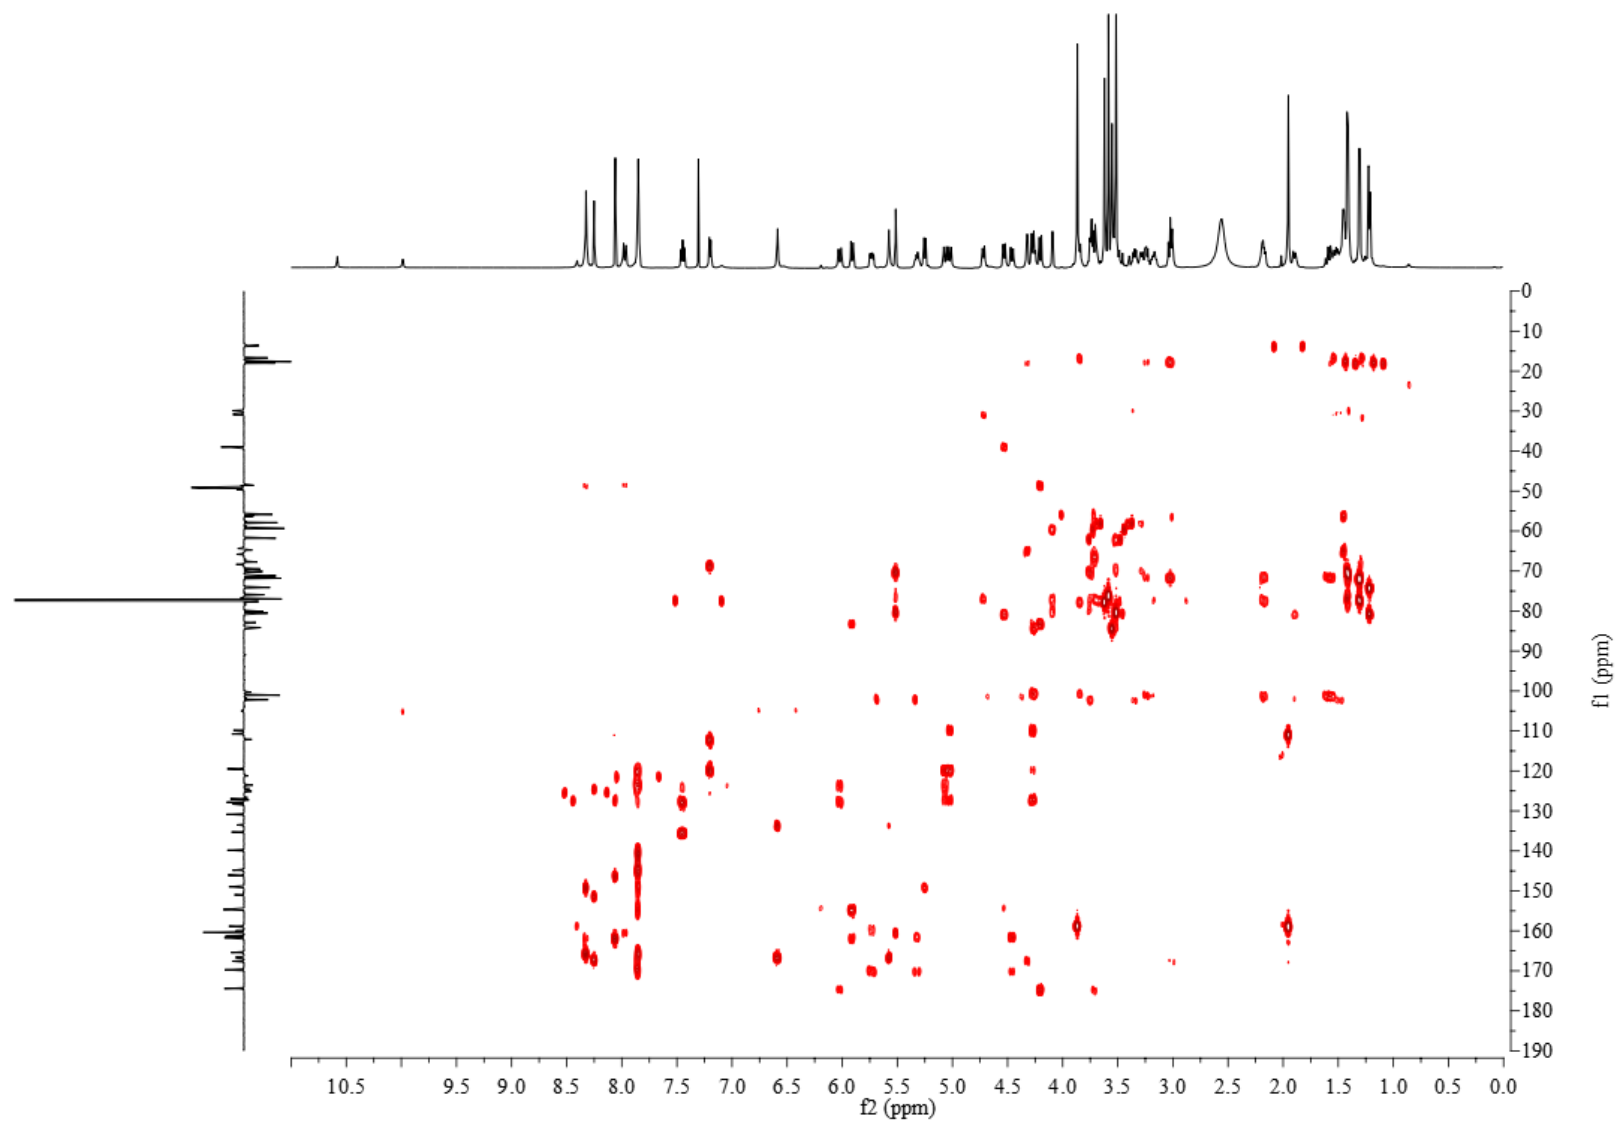

**Figure S7.**  $^1\text{H}$ - $^{13}\text{C}$  HMBC spectrum of persiathiacin A in  $\text{CDCl}_3$ - $\text{CD}_3\text{OD}$  (9:1).

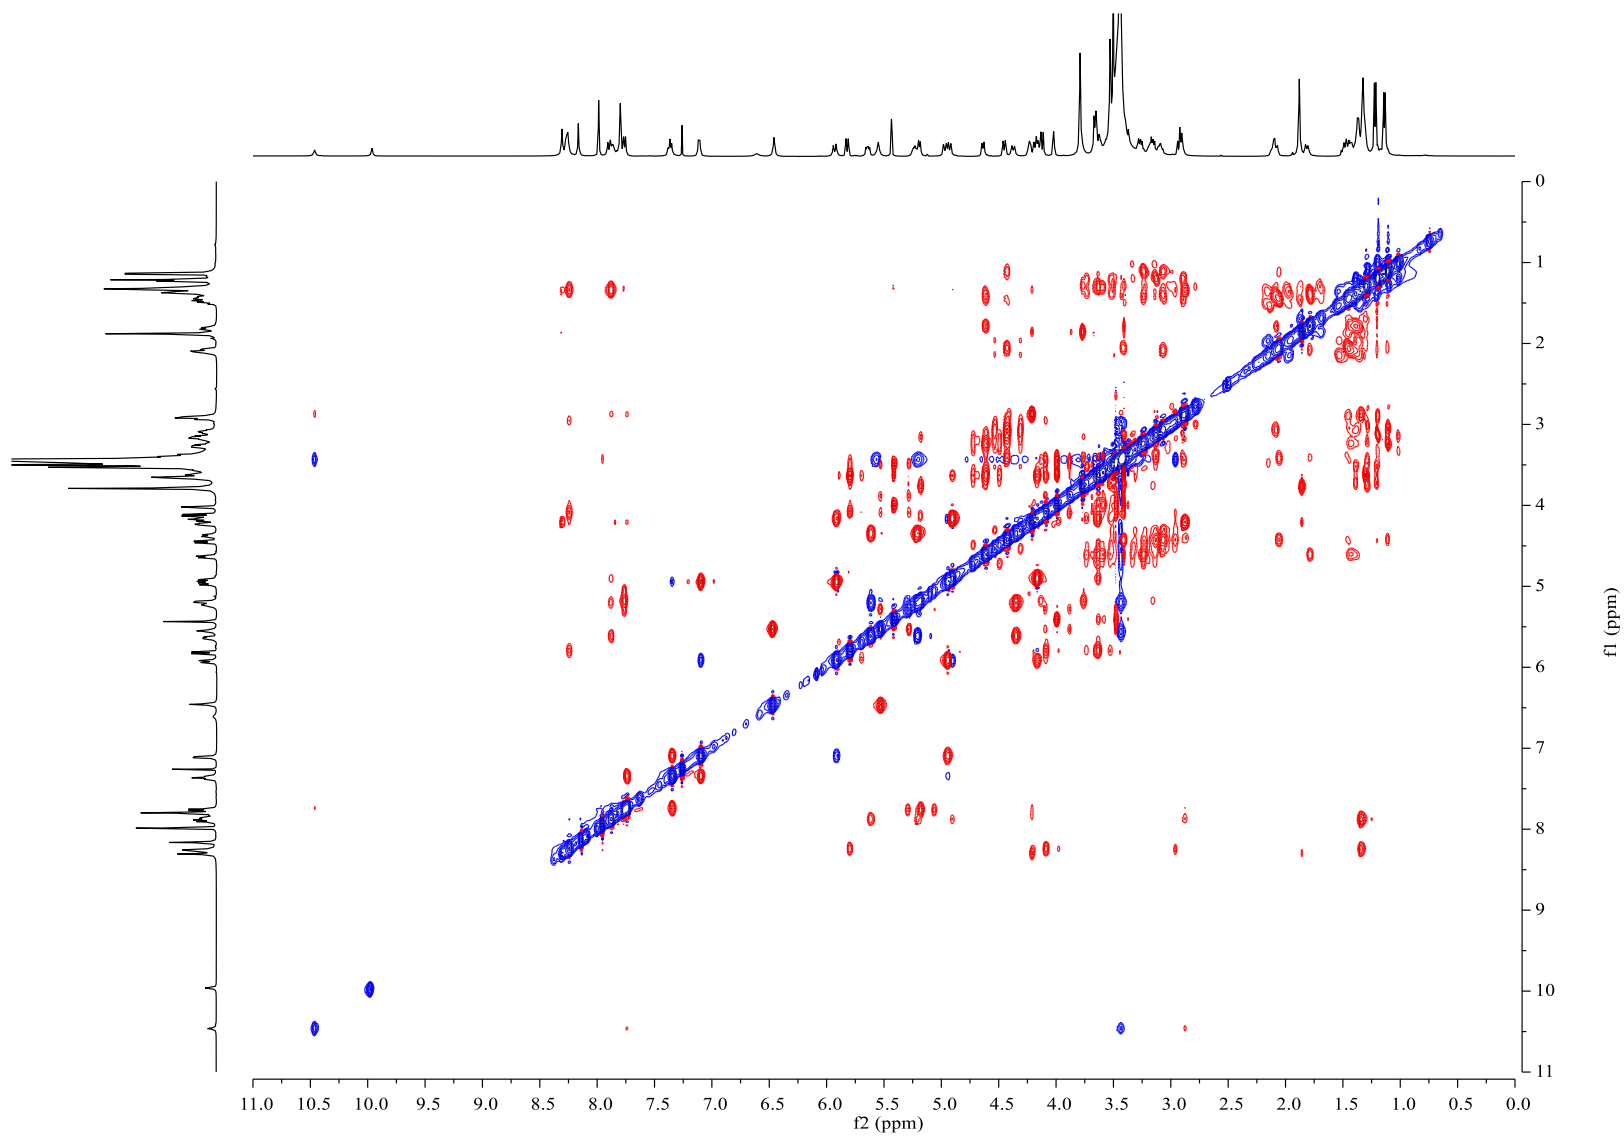

**Figure S8.**  $^1\text{H}$ - $^1\text{H}$  ROESY spectrum of persiathiacin A in  $\text{CDCl}_3$ - $\text{CD}_3\text{OD}$  (9:1).

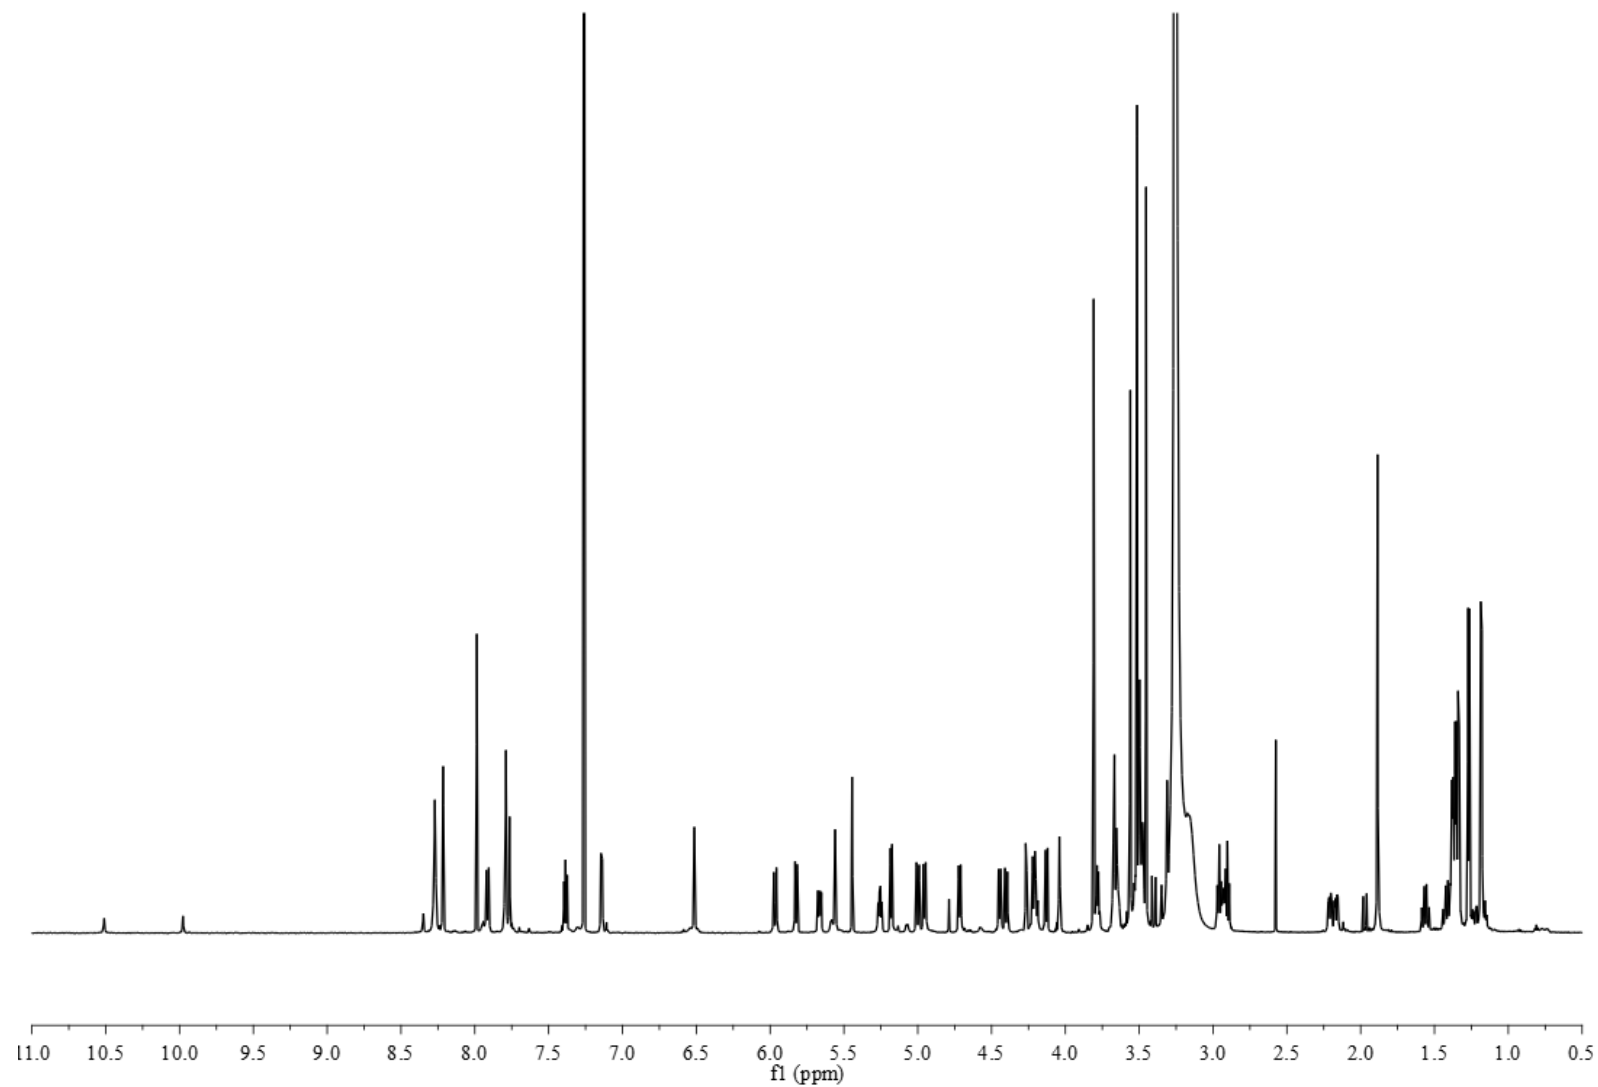

**Figure S9.** <sup>1</sup>H NMR spectrum (700 MHz) of persiathiacin B in CDCl<sub>3</sub>-CD<sub>3</sub>OD (9:1).



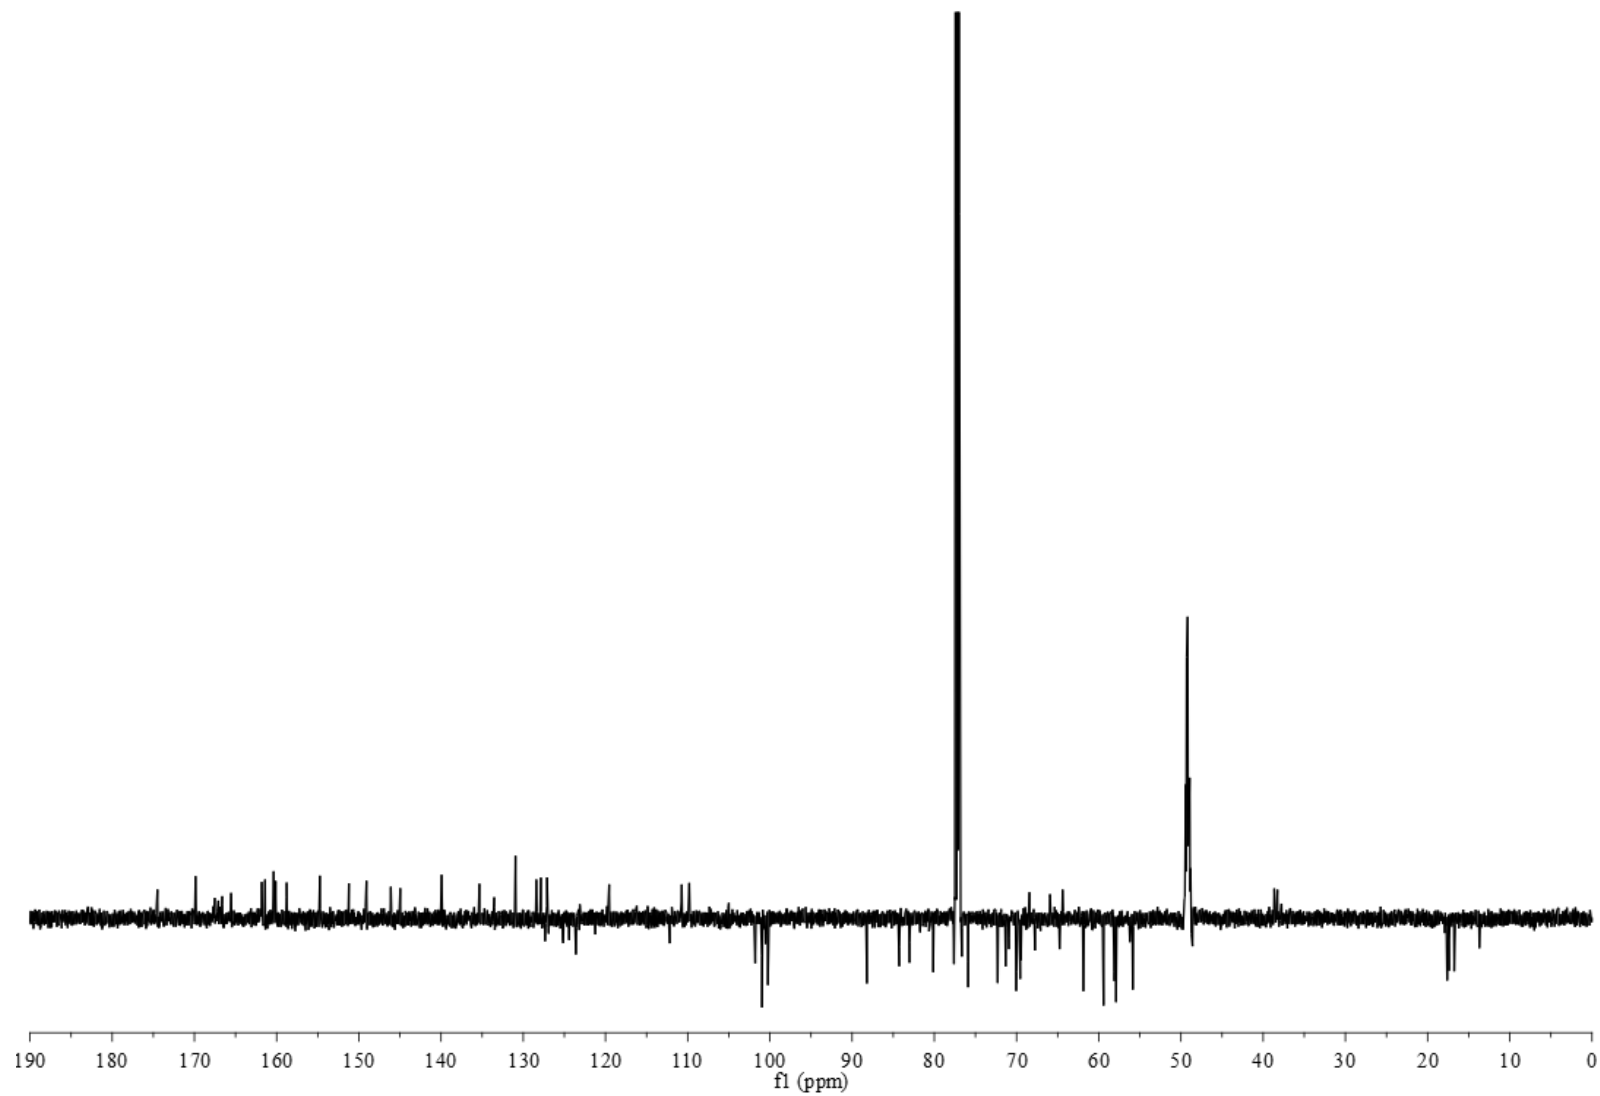

**Figure S10.**  $^{13}\text{C}$  NMR spectrum (176 MHz) of persiathiacin B in  $\text{CDCl}_3\text{-CD}_3\text{OD}$  (9:1).

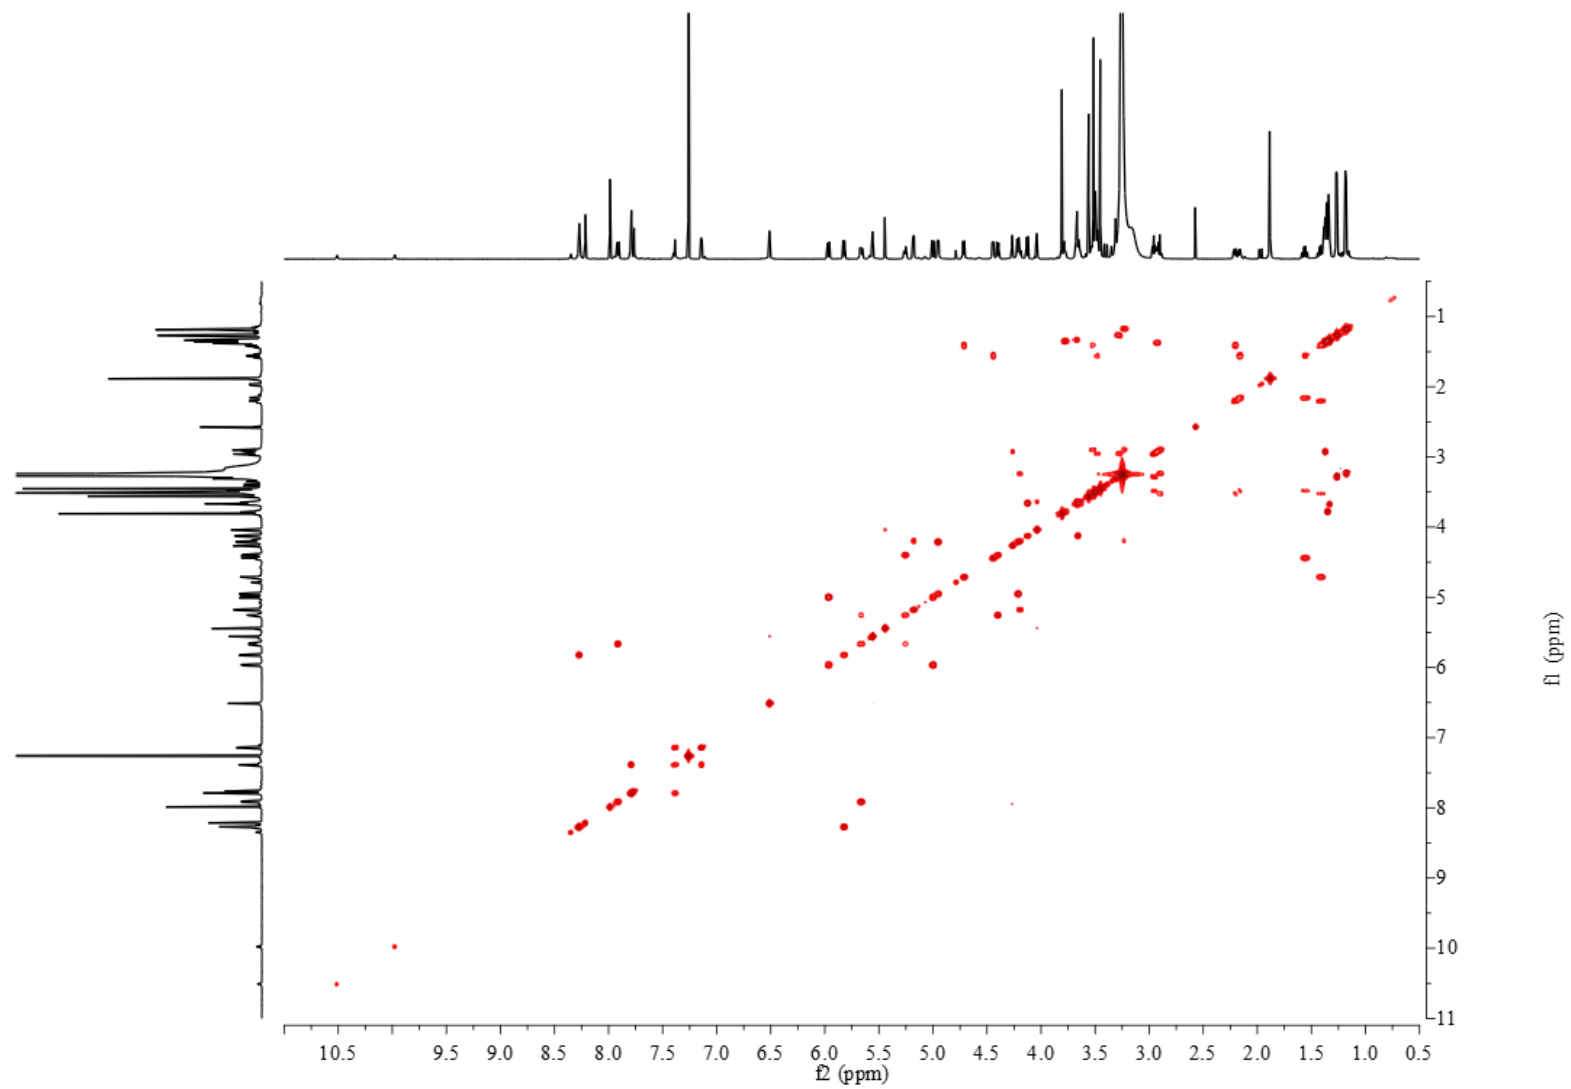

**Figure S11.**  $^1\text{H}$ - $^1\text{H}$  COSY spectrum of persiathiacin B in  $\text{CDCl}_3$ - $\text{CD}_3\text{OD}$  (9:1).

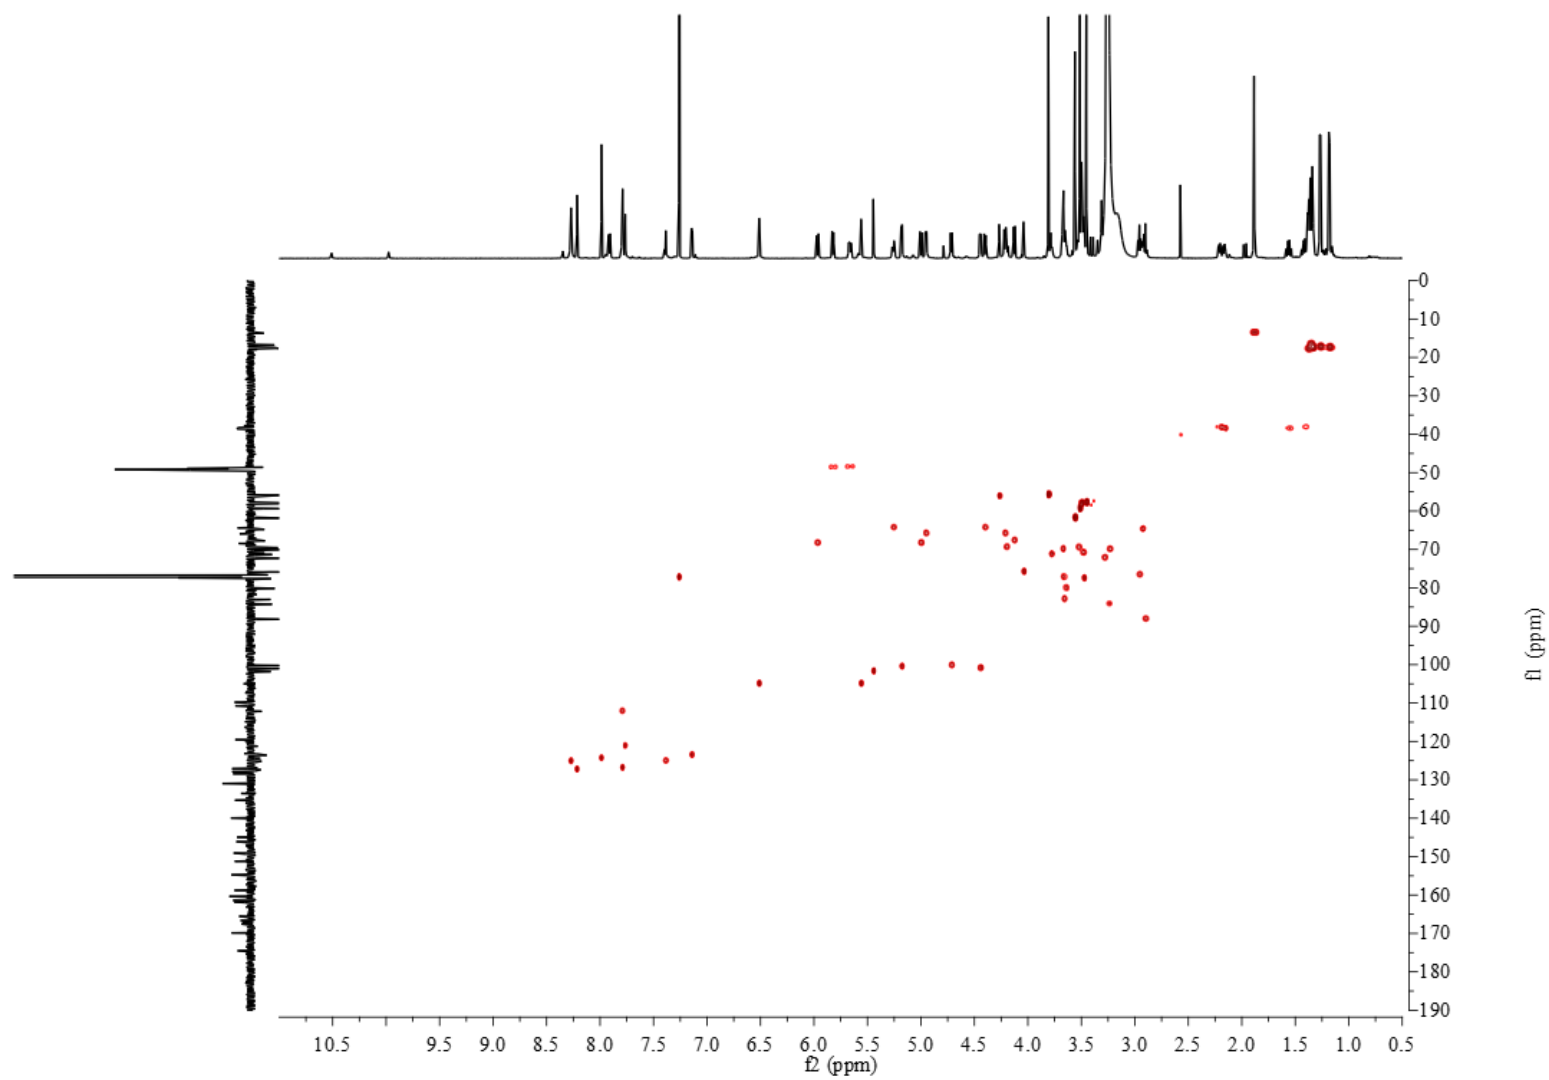

**Figure S12.**  $^1\text{H}$ - $^{13}\text{C}$  HSQC spectrum of persiathiacin B in  $\text{CDCl}_3$ - $\text{CD}_3\text{OD}$  (9:1).

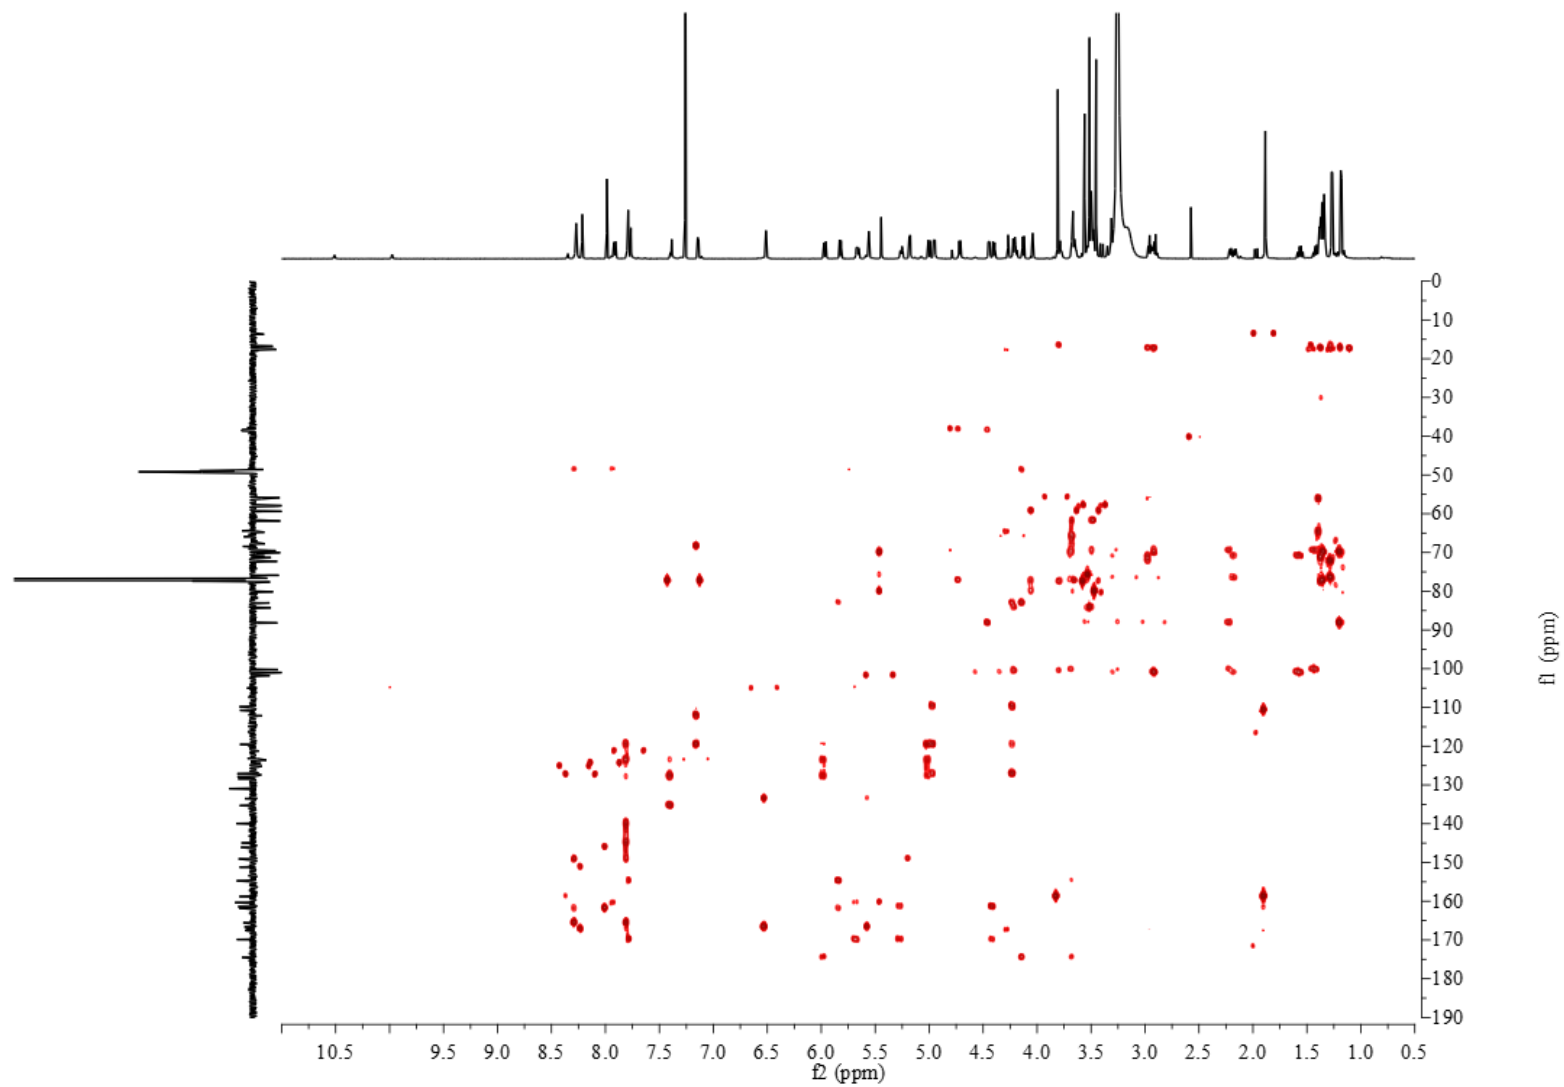

**Figure S13.**  $^1\text{H}$ - $^{13}\text{C}$  HMBC spectrum of persiathiacin B in  $\text{CDCl}_3$ - $\text{CD}_3\text{OD}$  (9:1).

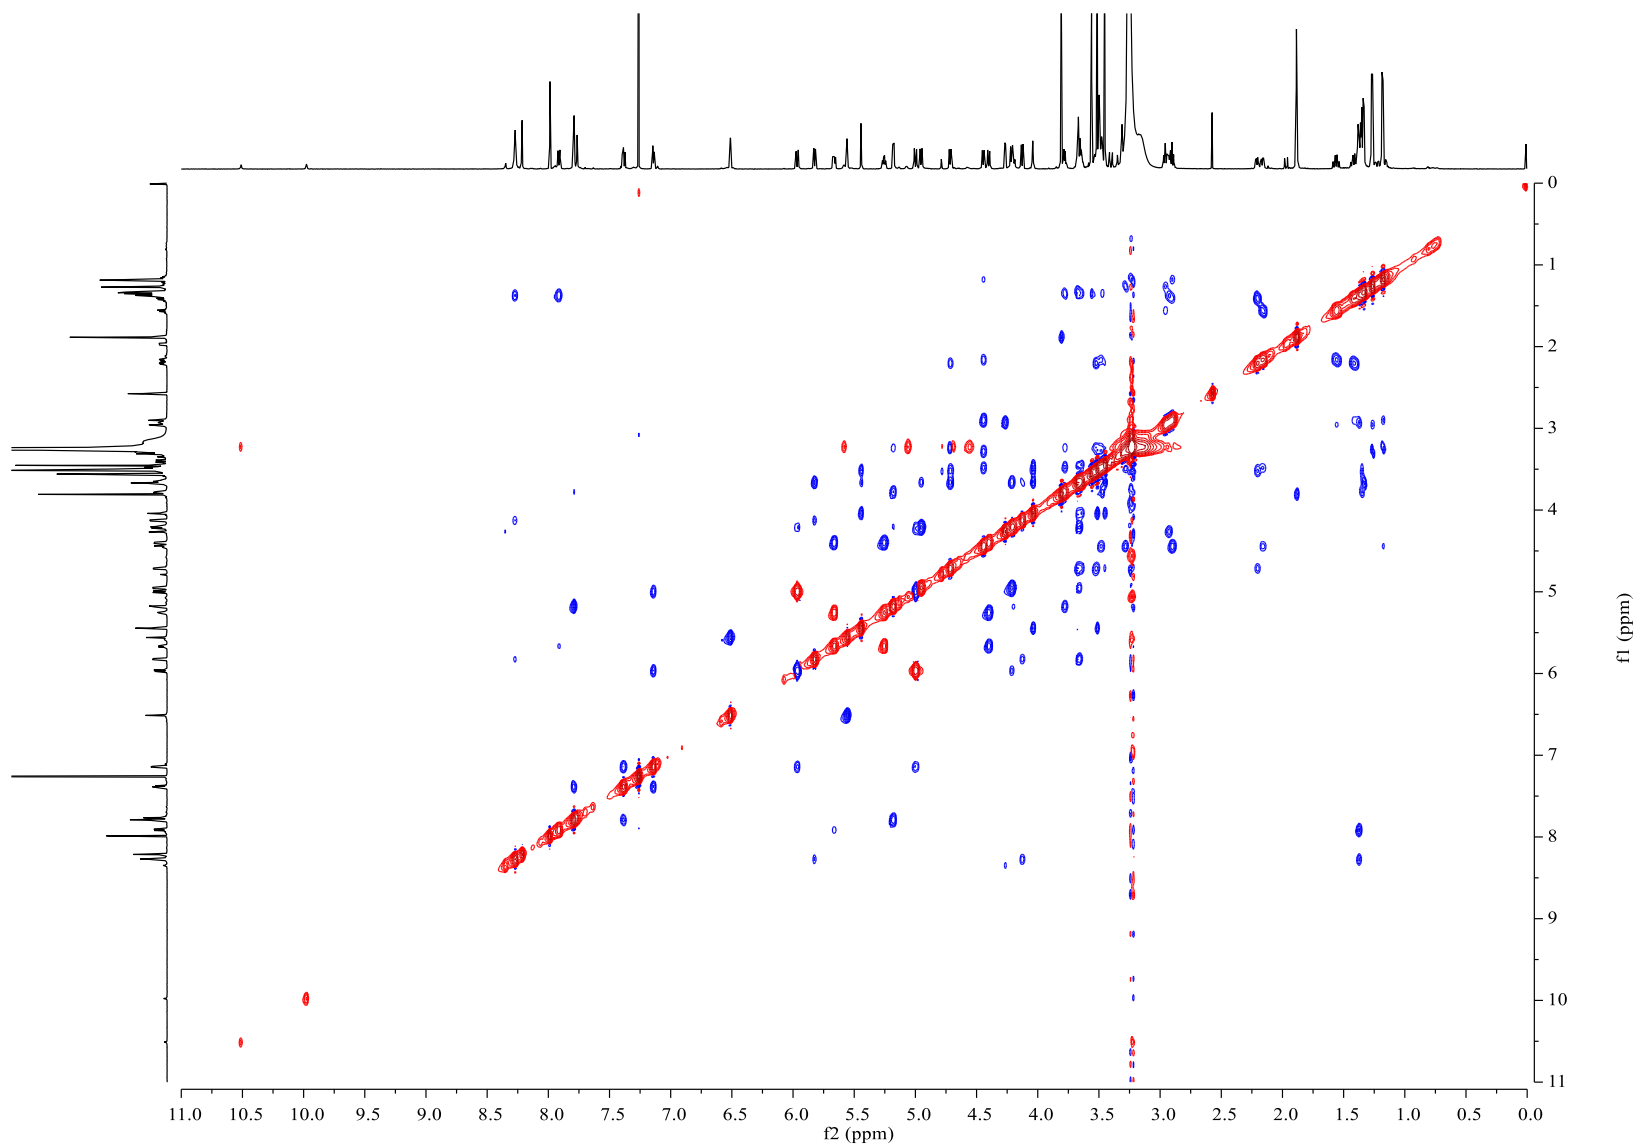

**Figure S14.**  $^1\text{H}$ - $^1\text{H}$  ROESY spectrum of persiathiacin B in  $\text{CDCl}_3$ - $\text{CD}_3\text{OD}$  (9:1).

**Table S3.** Predicted specialized metabolite biosynthetic gene clusters in the genome of *Actinokineospora* sp. UTMC 2448.

| <b>Cluster</b> | <b>antiSMASH functional prediction</b> | <b>Start position</b> | <b>End position</b> |
|----------------|----------------------------------------|-----------------------|---------------------|
| Cluster 1      | Arylpolyene                            | 361740                | 403998              |
| Cluster 2      | Ectoine                                | 427620                | 438018              |
| Cluster 3      | Terpene                                | 557729                | 606490              |
| Cluster 4      | T1pks-Nrps                             | 830346                | 897979              |
| Cluster 5      | Terpene                                | 1663302               | 1684207             |
| Cluster 6      | Bacteriocin                            | 1814304               | 1825113             |
| Cluster 7      | Siderophore                            | 1872946               | 1884691             |
| Cluster 8      | Nrps-Lantipeptide                      | 1895748               | 1950324             |
| Cluster 9      | T1pks                                  | 1951254               | 1997820             |
| Cluster 10     | Terpene                                | 2341218               | 2362180             |
| Cluster 11     | Thiopeptide-Oligosaccharide            | 2544416               | 2605135             |
| Cluster 12     | T2pks                                  | 2622827               | 2665306             |
| Cluster 13     | T3pks                                  | 2694719               | 2735756             |
| Cluster 14     | Otherks                                | 2799423               | 2846466             |
| Cluster 15     | T1pks                                  | 2851965               | 2898111             |
| Cluster 16     | Indole                                 | 2927064               | 2948149             |
| Cluster 17     | Phenazine                              | 3024546               | 3045010             |
| Cluster 18     | Nrps                                   | 3156780               | 3256358             |
| Cluster 19     | Terpene                                | 3260280               | 3281989             |
| Cluster 20     | Nrps                                   | 3330279               | 3386499             |
| Cluster 21     | Ectoine                                | 3571813               | 3582196             |
| Cluster 22     | Butyrolactone-Nrps                     | 3579882               | 3652648             |
| Cluster 23     | T1pks                                  | 3904090               | 3957797             |
| Cluster 24     | Other                                  | 4140452               | 4181138             |
| Cluster 25     | Terpene                                | 4239895               | 4261055             |
| Cluster 26     | Melanin                                | 4434945               | 4445863             |
| Cluster 27     | T1pks                                  | 4577600               | 4623818             |
| Cluster 28     | Lantipeptide                           | 4650662               | 4674898             |
| Cluster 29     | Ladderane-Arylpolyene-Nrps             | 4820757               | 4897663             |
| Cluster 30     | Lantipeptide-T1pks-NRPS                | 5700170               | 5876737             |
| Cluster 31     | Bacteriocin                            | 6203188               | 6214081             |
| Cluster 32     | T1pks-Butyrolactone                    | 6252778               | 6312920             |

**Table S4.** Genes in the persiathiacin biosynthetic gene cluster and the percentage identity of the proteins they encode to proteins of known function.

| Gene/Protein        | Locus_tag   | Length<br>bp/aa | Similar Proteins                                                                                                     | % aa<br>Identity |
|---------------------|-------------|-----------------|----------------------------------------------------------------------------------------------------------------------|------------------|
| <i>perO</i> /PerO   | Actin_02399 | 906/302         | NocO ( <i>Nocardia</i> sp. ATCC202099)<br>NosO ( <i>Streptomyces actuosus</i> )                                      | 52<br>44         |
| <i>perN</i> /PerN   | Actin_02400 | 1236/412        | NocN ( <i>Nocardia</i> sp. ATCC202099)<br>NosN ( <i>Streptomyces actuosus</i> )                                      | 85<br>75         |
| <i>perM</i> /PerM   | Actin_02401 | 147/49          | NocM ( <i>Nocardia</i> sp. ATCC202099)<br>NosM ( <i>Streptomyces actuosus</i> )                                      | 98<br>88         |
| <i>perL</i> /PerL   | Actin_02402 | 1188/396        | NocL ( <i>Nocardia</i> sp. ATCC202099)<br>NosL ( <i>Streptomyces actuosus</i> )                                      | 85<br>82         |
| <i>perK</i> /PerK   | Actin_02403 | 846/282         | NocK ( <i>Nocardia</i> sp. ATCC202099)<br>NosK ( <i>Streptomyces actuosus</i> )                                      | 67<br>59         |
| <i>perI</i> /PerI   | Actin_02404 | 1260/420        | NocI ( <i>Nocardia</i> sp. ATCC202099)<br>NosI ( <i>Streptomyces actuosus</i> )                                      | 67<br>62         |
| <i>perH</i> /PerH   | Actin_02405 | 1728/576        | NocH ( <i>Nocardia</i> sp. ATCC202099)<br>NosH ( <i>Streptomyces actuosus</i> )                                      | 54<br>49         |
| <i>perG</i> /PerG   | Actin_02406 | 1854/618        | NocG ( <i>Nocardia</i> sp. ATCC202099)<br>NosG ( <i>Streptomyces actuosus</i> )                                      | 73<br>65         |
| <i>perF</i> /PerF   | Actin_02407 | 1398/466        | NocF ( <i>Nocardia</i> sp. ATCC202099)<br>NosF ( <i>Streptomyces actuosus</i> )                                      | 47<br>44         |
| <i>perE</i> /PerE   | Actin_02408 | 2589/863        | NocE ( <i>Nocardia</i> sp. ATCC202099)<br>NosE ( <i>Streptomyces actuosus</i> )                                      | 64<br>56         |
| <i>perD</i> /PerD   | Actin_02409 | 966/322         | NocD ( <i>Nocardia</i> sp. ATCC202099)<br>NosD ( <i>Streptomyces actuosus</i> )                                      | 59<br>55         |
| <i>perC</i> /PerC   | Actin_02410 | 1221/407        | NocC ( <i>Nocardia</i> sp. ATCC202099)<br>NosC ( <i>Streptomyces actuosus</i> )                                      | 81<br>71         |
| <i>perV</i> /PerV   | Actin_02411 | 1122/374        | NocV ( <i>Nocardia</i> sp. ATCC202099)                                                                               | 71               |
| <i>perR</i> /PerR   | Actin_02412 | 516/172         | NocR ( <i>Nocardia</i> sp. ATCC202099)                                                                               | 87               |
| <i>perQ</i> /PerQ   | Actin_02413 | 597/199         | NocQ ( <i>Nocardia</i> sp. ATCC202099)                                                                               | 78               |
| <i>perU</i> /PerU   | Actin_02414 | 1173/391        | NocU ( <i>Nocardia</i> sp. ATCC202099)                                                                               | 59               |
| <i>perT</i> /PerT   | Actin_02415 | 1122/374        | NocT ( <i>Nocardia</i> sp. ATCC202099)                                                                               | 59               |
| <i>perS1</i> /PerS1 | Actin_02416 | 1020/340        | Oxidoreductase ( <i>Streptomyces</i> sp.)<br>NDP-hexose-3-ketoreductase<br>( <i>Streptoalloteichus hindustanus</i> ) | 61<br>59         |
| <i>perP</i> /PerP   | Actin_02417 | 993/331         | NocP ( <i>Nocardia</i> sp. ATCC202099)<br>NosP ( <i>Streptomyces actuosus</i> )                                      | 61<br>55         |
| <i>perB</i> /PerB   | Actin_02418 | 1185/395        | NosB ( <i>Streptomyces actuosus</i> )<br>NocB ( <i>Nocardia</i> sp. ATCC202099)                                      | 55<br>54         |
| <i>perS2</i> /PerS2 | Actin_02419 | 858/286         | UDP-glucose 4-epimerase<br>( <i>Amycolatopsis pretoriensis</i> )<br>SpeI ( <i>Streptomyces spectabilis</i> )         | 44<br>43         |

| Gene/Protein          | Locus_tag   | Length<br>bp/aa | Similar Proteins                                                                                                               | % aa<br>Identity |
|-----------------------|-------------|-----------------|--------------------------------------------------------------------------------------------------------------------------------|------------------|
| <i>perS3</i> /PerS3   | Actin_02420 | 819/273         | macrocin O-methyltransferase<br>( <i>Micromonospora viridifaciens</i> )                                                        | 60               |
|                       |             |                 | putative methyl transferase<br>( <i>Streptomyces argenteolus</i> )                                                             | 51               |
| <i>perS4</i> /PerS4   | Actin_02421 | 1137/379        | rhamnosyltransferase ( <i>Streptomyces</i><br>sp. SANK 60405)<br>glycosyltransferase ( <i>Allokutzneria</i><br><i>albata</i> ) | 40<br>39         |
| <i>perS5</i> /PerS5   | Actin_02422 | 786/262         | class I SAM-dependent<br>methyltransferase<br>( <i>Kitasatospora mediocidica</i> )                                             | 53               |
|                       |             |                 | ( <i>Micromonospora viridifaciens</i> )                                                                                        | 51               |
| <i>perX</i> /PerX     | Actin_02423 | 1176/392        | cytochrome P450<br>( <i>Actinobacteria bacterium</i> OK074)<br>( <i>Streptomyces gilvigriseus</i> )                            | 41<br>40         |
| <i>perS6</i> /PerS6   | Actin_02424 | 1197/399        | glycosyltransferase<br>( <i>Streptomyces aizunensis</i> )                                                                      | 45               |
|                       |             |                 | ( <i>Kutzneria</i> sp. 744)                                                                                                    | 41               |
| <i>perS7</i> /PerS7   | Actin_02425 | 1134/378        | class I SAM-dependent<br>methyltransferase<br>( <i>Actinoalloteichus hymeniacidonis</i> )                                      | 70               |
|                       |             |                 | ( <i>Nocardia puris</i> )                                                                                                      | 52               |
| <i>perS8</i> /PerS8   | Actin_02426 | 1044/348        | glycosyltransferase<br>( <i>Streptomyces aizunensis</i> )                                                                      | 50               |
|                       |             |                 | ( <i>Streptomyces</i> sp. WMMB 714)                                                                                            | 45               |
| <i>perS9</i> /PerS9   | Actin_02427 | 1086/362        | glycosyltransferase<br>( <i>Amycolatopsis tolypomycina</i> )                                                                   | 41               |
|                       |             |                 | ( <i>Streptomyces</i> sp. PAN_FS17)                                                                                            | 40               |
| <i>perS10</i> /PerS10 | Actin_02428 | 1404/468        | NDP-hexose 2,3-dehydratase<br>( <i>Plantactinospora</i> sp. KBS50)                                                             | 60               |
|                       |             |                 | ( <i>Amycolatopsis vancoremycina</i> )                                                                                         | 59               |
| <i>perS11</i> /PerS11 | Actin_02429 | 912/304         | NDP-hexose 4-ketoreductase<br>( <i>Micromonospora</i> sp. CNZ309)                                                              | 56               |
|                       |             |                 | ( <i>Micromonospora echinofusca</i> )                                                                                          | 56               |
| <i>perS12</i> /PerS12 | Actin_02430 | 1305/435        | NDP-hexose 3,4-dehydratase<br>( <i>Streptomyces minoensis</i> )                                                                | 71               |
|                       |             |                 | ( <i>Streptomyces caniferus</i> )                                                                                              | 70               |
| <i>perA</i> /PerA     | Actin_02431 | 435/145         | NocA ( <i>Nocardia</i> sp. ATCC202099)                                                                                         | 59               |
|                       |             |                 | NosA ( <i>Streptomyces actuosus</i> )                                                                                          | 67               |



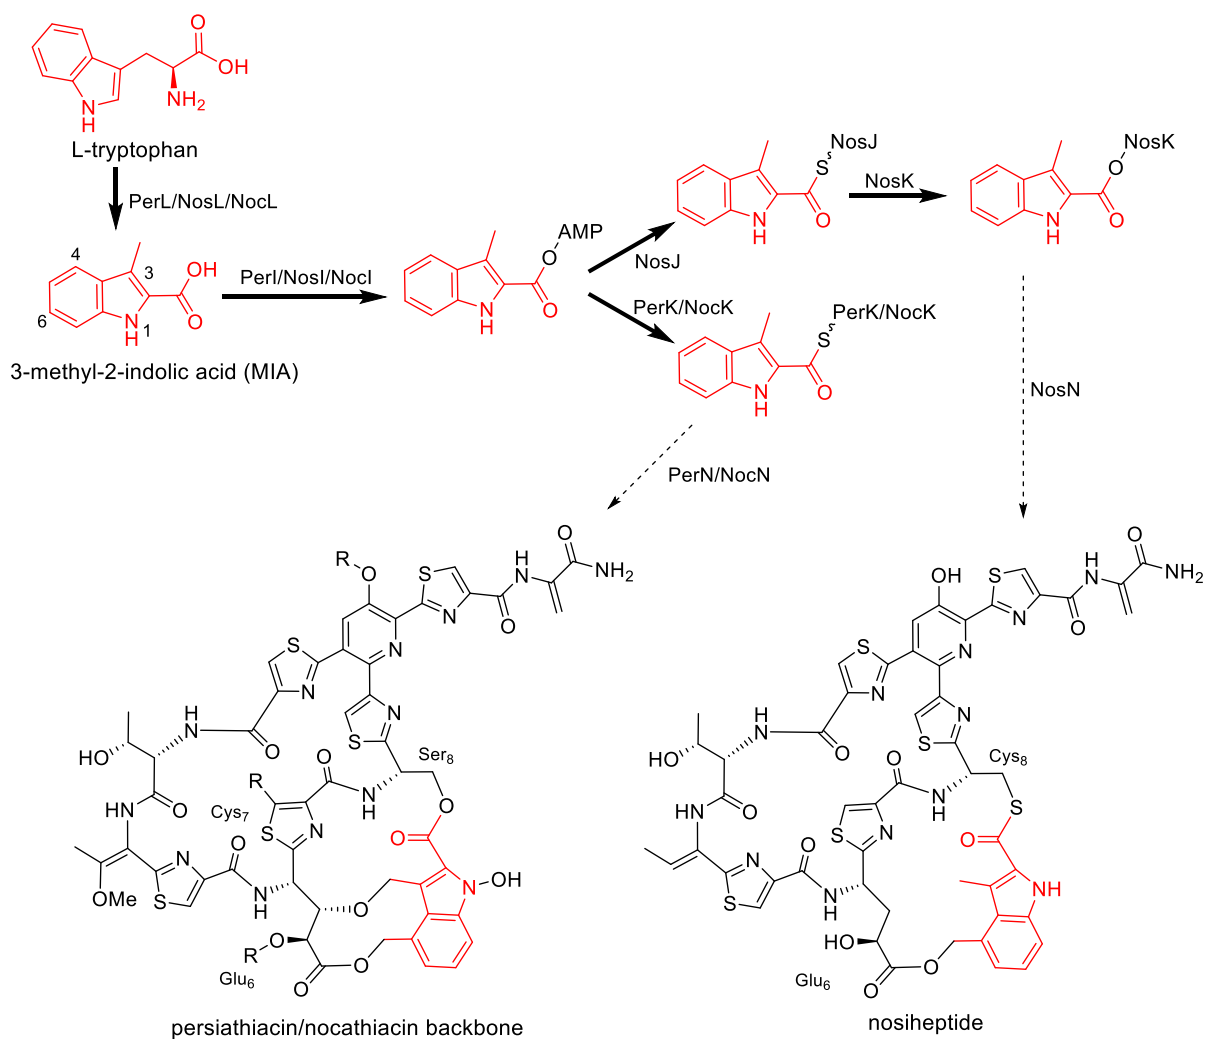

**Figure S15.** Similarities and differences in the activation and attachment of MIA to the processed core peptides of nosiheptide, persiathiacin, and nocathiacin (R-groups in persiathiacin and nocathiacin are shown in Figures 1 and 2 of the main manuscript).

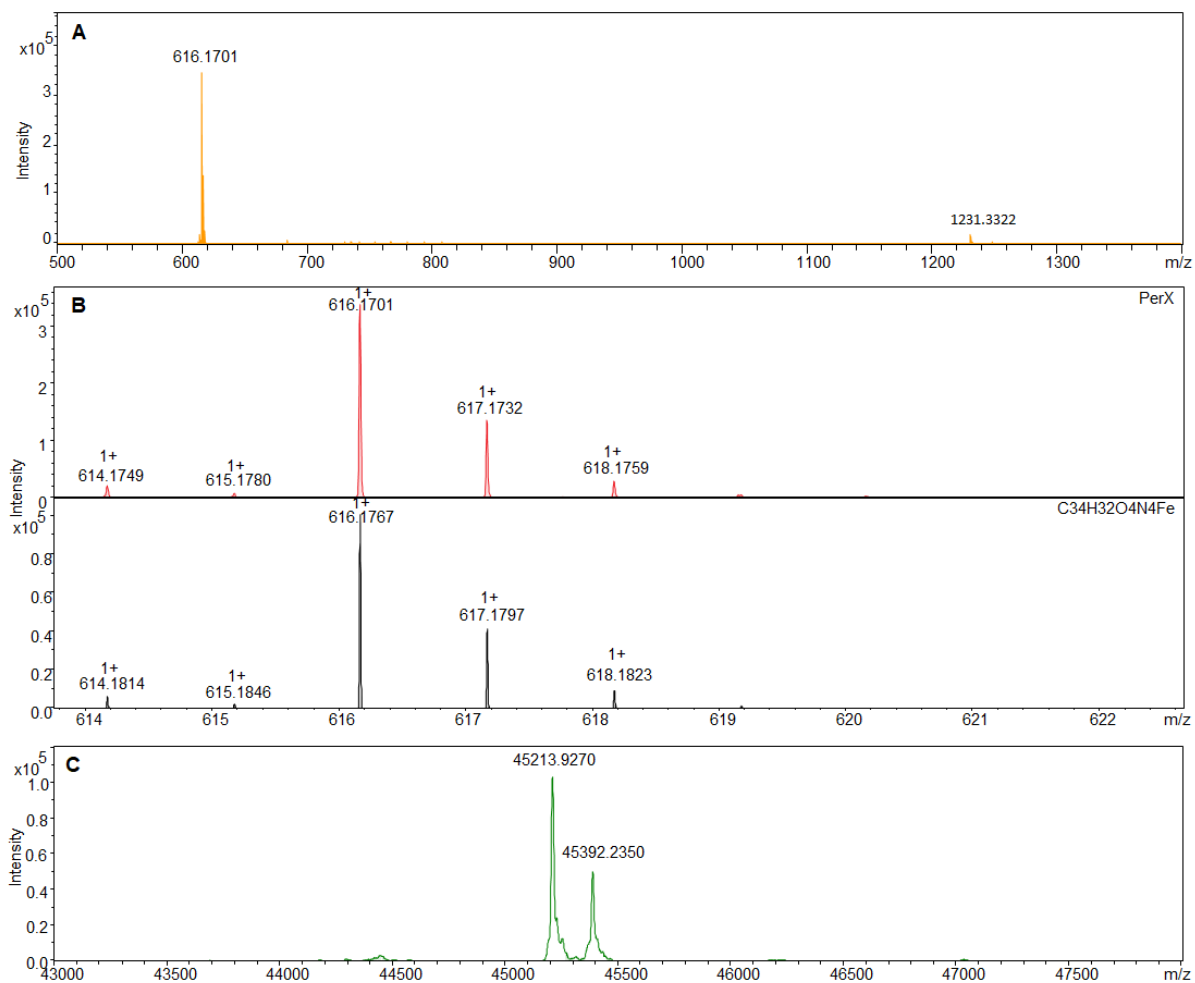

**Figure S16.** ESI-Q-TOF-MS analysis of purified recombinant PerX. (A) An ion with  $m/z = 616.1701$ , corresponding to  $[M]^+$  for ferric haem, is observed. (B) Comparison of the measured (top) and simulated (bottom) spectra for the  $[M]^+$  ion of ferric haem. (C) Deconvoluted mass spectrum of PerX. The measured masses correspond to the protein after loss of the N-terminal methionine residue (measured: 45213.92, calculated: 45215.35) and a glucuronidated derivative (measured: 45392.23, calculated: 45391.35).

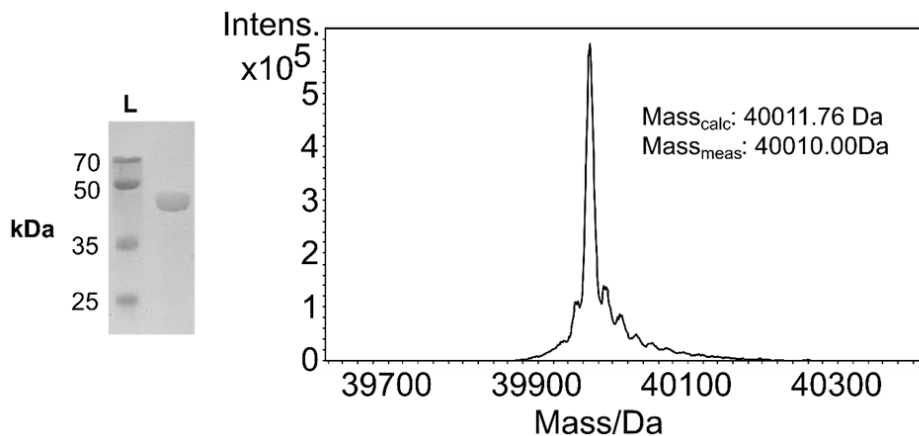

**Figure S17.** SDS-PAGE (left) and intact protein MS (right) of purified recombinant PerS4.

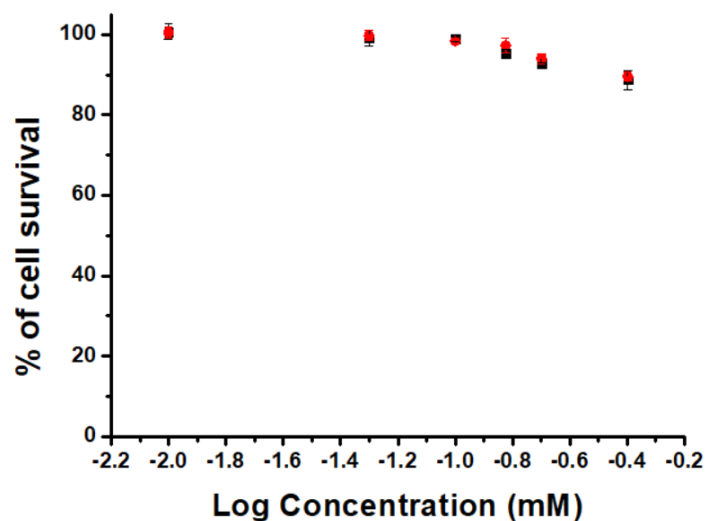

**Figure S18.** Percentage of A2780 ovarian cancer cells surviving after exposure to various concentrations of persiathiacin A ranging from 10 to 400  $\mu$ M relative to untreated (vehicle) controls. These experiments included 24 h of drug exposure time and 72 h of recovery time in drug-free medium. Red circles and black squares represent data from two independent replicates.
